# Supplementary material for: Biodiversity of New Lytic Bacteriophages Infecting Shigella spp. in Freshwater Environment
Source: PubMed Central journal article supplement (PMC7925395; doi:10.3389/fmicb.2021.619323), 2021-02-17
Supplement: Data_Sheet_1.pdf [file Data_Sheet_1.pdf]

# **Biodiversity of new lytic bacteriophages infecting *Shigella* spp. in fresh water environment**

Khashayar Shahin<sup>1</sup>, Mohadeseh Barazandeh<sup>1</sup>, Lili Zhang<sup>1</sup>, Abolghasem Hedayatkah<sup>2</sup>, TaoHe<sup>1</sup>, Hongduo Bao<sup>1</sup>, Mojtaba Mansoorianfar<sup>3</sup>, Maoda Pang<sup>1</sup>, Heye Wang<sup>1</sup>, Ruicheng Wei<sup>1</sup>, Ran Wang<sup>1</sup>

<sup>1</sup> Institute of Food Safety and Nutrition, Key Lab of Food Quality and Safety of Jiangsu Province-State Key Laboratory Breeding Base, Jiangsu Academy of Agricultural Sciences, Nanjing, 210014, China

<sup>2</sup> School of Pharmacy and Biomedical Sciences, CHIRI Biosciences, Curtin University, GPO Box U1987, Perth, WA 6845, Australia

<sup>3</sup> Nanjing Forestry University

**Table S1.**

The bacterial strains used in this study, and the host range and efficiency of plating (EOP) for the three isolated bacteriophages

| Bacterial species                    | Source                  | vB_SfIM_004 |             | vB_SdyM_006 |             | vB_SsoS_008 |             |
|--------------------------------------|-------------------------|-------------|-------------|-------------|-------------|-------------|-------------|
|                                      |                         | Spot test   | EOP         | Spot test   | EOP         | Spot test   | EOP         |
| <i>Shigella dysenteriae</i>          | PTCC 1188               | –           |             | ++          | 0.93 ± 0.06 | –           |             |
| <i>Shigella dysenteriae</i> (S.d.f1) | Vegetables              | –           |             | ++          | 1.00        | –           |             |
| <i>Shigella dysenteriae</i> (S.d.f2) | Vegetables              | –           |             | ++          | 0.77 ± 0.05 | –           |             |
| <i>Shigella sonnei</i>               | ATCC 9290               | +           | 0.14 ± 0.08 | –           |             | ++          | 0.88 ± 0.06 |
| <i>Shigella sonnei</i> (w8)          | Ready to eat food       | –           |             | –           |             | ++          | 1.00        |
| <i>Shigella sonnei</i> (w9)          | Vegetables              | +           | 0.25 ± 0.03 | –           |             | ++          | 0.68 ± 0.05 |
| <i>Shigella sonnei</i> (w44)         | Ready to eat food       | –           |             | –           |             | +           | 0.35 ± 0.04 |
| <i>Shigella sonnei</i> (Sh.s-3 )     | Vegetables              | +           | 0.29 ± 0.05 | –           |             | +           | 0.23 ± 0.05 |
| <i>Shigella sonnei</i> (Sh.s-26)     | Meat                    | +           | 0.33 ± 0.06 | –           |             | ++          | 0.70 ± 0.05 |
| <i>Shigella sonnei</i> (Sh.s-77)     | Vegetables              | –           |             | –           |             | +           | 0.40 ± 0.01 |
| <i>Shigella flexneri</i>             | ATCC 12022              | ++          | 0.97 ± 0.01 | –           |             | ++          | 0.65 ± 0.05 |
| <i>Shigella flexneri</i>             | PTCC 1234               | ++          | 0.90 ± 0.05 | –           |             | +           | 0.12 ± 0.07 |
| <i>Shigella flexneri</i>             | PTCC 1865               | ++          | 0.92 ± 0.03 | –           |             | +           | 0.22 ± 0.03 |
| <i>Shigella flexneri</i> (w7)        | Ready to eat food       | ++          | 1.00        | –           |             | ++          | 0.56 ± 0.02 |
| <i>Shigella flexneri</i> (w16)       | Vegetables              | ++          | 0.70 ± 0.09 | –           |             | ++          | 0.43 ± 0.08 |
| <i>Shigella flexneri</i> (w19)       | Vegetables              | ++          | 0.75 ± 0.05 | –           |             | +           | 0.30 ± 0.04 |
| <i>Shigella flexneri</i> (w27)       | Vegetables              | ++          | 0.47 ± 0.06 | –           |             | ++          | 0.54 ± 0.01 |
| <i>Shigella flexneri</i> (W2)        | Vegetables              | ++          | 0.39 ± 0.02 | –           |             | ++          | 0.50 ± 0.08 |
| <i>Shigella flexneri</i> (Sh.f-8)    | Vegetables              | ++          | 0.41 ± 0.02 | –           |             | +           | 0.17 ± 0.02 |
| <i>Escherichia coli</i>              | ATCC 25922              | –           |             | –           |             | –           |             |
| <i>Escherichia coli</i>              | Urinary Tract Infection | –           |             | –           |             | –           |             |
| <i>Escherichia coli</i>              | Bedsore                 | –           |             | –           |             | –           |             |
| <i>Klebsiella pneumoniae</i>         | ATCC 13883              | –           |             | –           |             | –           |             |
| <i>Streptococcus pneumoniae</i>      | ATCC 49619              | –           |             | –           |             | –           |             |

|                                     |                      |   |   |   |
|-------------------------------------|----------------------|---|---|---|
| <i>Pseudomonas aeruginosa</i>       | ATCC 27853           | — | — | — |
| <i>Pseudomonas aeruginosa</i>       | Burn Wound Infection | — | — | — |
| <i>Enterobacter cloacae</i>         | Bedsore              | — | — | — |
| <i>Enterococcus faecalis</i>        | ATCC 29212           | — | — | — |
| <i>Salmonella typhimurium</i>       | ATCC 14028           | — | — | — |
| <i>Proteus mirabilis</i>            | ATCC 43071           | — | — | — |
| <i>Staphylococcus saprophyticus</i> | ATCC 15305           | — | — | — |
| <i>Staphylococcus epidermidis</i>   | ATCC 12228           | — | — | — |
| <i>Staphylococcus aureus</i>        | ATCC 35933           | — | — | — |
| <i>Staphylococcus aureus MRSA</i>   | ATCC 33591           | — | — | — |
| <i>Bacillus cereus</i>              | ATCC 11778           | — | — | — |
| <i>Bacillus subtilis</i>            | ATCC 12711           | — | — | — |
| <i>Enterobacter aerogene</i>        | ATCC 13048           | — | — | — |
| <i>Streptococcus pyogenes</i>       | ATCC 19615           | — | — | — |
| <i>Proteus mirabilis</i>            | ATCC 43071           | — | — | — |

---

++, clear plaque; +, cloudy plaque; —, no plaque. The EOP (efficiency of plating) values were shown as the mean of three repeats  $\pm$  standard deviation (SD)

**Table S2.**

Categorization of the efficiency of plating (EOP) of the *Shigella* phages against different isolates of *Shigella* spp..

|                                    | vB_SflM_004 | vB_SdyM_006 | vB_SsoS_008 |
|------------------------------------|-------------|-------------|-------------|
| <b><i>S. dysenteries</i> (n=3)</b> |             |             |             |
| EOP $\geq$ 0.5                     | –           | 3           | –           |
| $0.1 \leq$ EOP < 0.5               | –           | 0           | –           |
| $0.001 <$ EOP < 0.1                | –           | 0           | –           |
| <b><i>S. flexneri</i> (n=9)</b>    |             |             |             |
| EOP $\geq$ 0.5                     | 6           | –           | 4           |
| $0.1 \leq$ EOP < 0.5               | 3           | –           | 5           |
| $0.001 <$ EOP < 0.1                | 0           | –           | 0           |
| <b><i>S. sonnei</i> (n=7)</b>      |             |             |             |
| EOP $\geq$ 0.5                     | 0           | –           | 4           |
| $0.1 \leq$ EOP < 0.5               | 4           | –           | 3           |
| $0.001 <$ EOP < 0.1                | 0           | –           | 0           |

**Table S3.**

The predicted tRNA coding sequences of vB\_SdyM\_006 genome

| <b>tRNA</b> | <b>Strand</b> | <b>Position</b> | <b>Anticodon</b> | <b>Amino acid</b> |
|-------------|---------------|-----------------|------------------|-------------------|
| <b>1</b>    | Complement    | 65128..65203    | TTC              | Glu               |
| <b>2</b>    | Complement    | 65211..65302    | TGA              | Ser               |
| <b>3</b>    | Complement    | 65651..65726    | GTC              | Asp               |
| <b>4</b>    | Complement    | 65920..65994    | TCC              | Gly               |
| <b>5</b>    | Complement    | 66799..66874    | CAT              | Ile2              |
| <b>6</b>    | Complement    | 66882..66966    | GTA              | Tyr               |
| <b>7</b>    | Complement    | 67012..67088    | TCT              | Arg               |
| <b>8</b>    | Complement    | 67403..67477    | CCA              | Trp               |
| <b>9</b>    | complement    | 67479..67562    | GTT              | Asn               |

**Table S4.**

Comparison of the basic genomic properties of phages vB\_SflM\_004, vB\_SdyM\_006 and vB\_SsoS\_008 with other similar phages

|                       | <b>% identity</b> | <b>Genome length</b> | <b>GC-content</b> | <b>Total/identified ORF</b> | <b>No. of tRNA</b> | <b>Accession no.</b> |
|-----------------------|-------------------|----------------------|-------------------|-----------------------------|--------------------|----------------------|
| <b>vB_SflM_004</b>    | 100               | 85,887               | 38.6              | 135/48                      | 0                  | MK295205             |
| <b>WV8</b>            | 94.2              | 88487                | 38.7              | 137/20                      | 18                 | EU877232             |
| <b>phage 11</b>       | 94.2              | 88771                | 38.5              | 148/47                      | 26                 | KP869109             |
| <b>phage 12</b>       | 94.2              | 88632                | 38.4              | 132/21                      | 26                 | KP869110             |
| <b>BPS15Q2</b>        | 94.1              | 89817                | 38.6              | 130/45                      |                    | KX405003             |
| <b>vB_SdyM_006</b>    | 100               | 166,138              | 31.5              | 252/105                     | 9                  | MK295204             |
| <b>phiP4-3</b>        | 97                | 167849               | 31.4              | 270/119                     | 8                  | MG696114             |
| <b>vB_PmiM_Pm5461</b> | 86                | 161989               | 31.5              | 252/119                     | 8                  | KP890823             |
| <b>vB_SsoS_008</b>    | 100               | 50,414               | 46.5              | 83/34                       | 0                  | MK335533             |
| <b>T1</b>             | 91.73             | 48836                | 46.5              | 78/23                       | 0                  | AY216660             |
| <b>phi2457T</b>       | 91                | 50219                | 46.6              | 80/21                       | 0                  | MH917278             |
| <b>SH6</b>            | 91                | 50552                | 46.6              | 82/26                       | 0                  | NC_047785            |



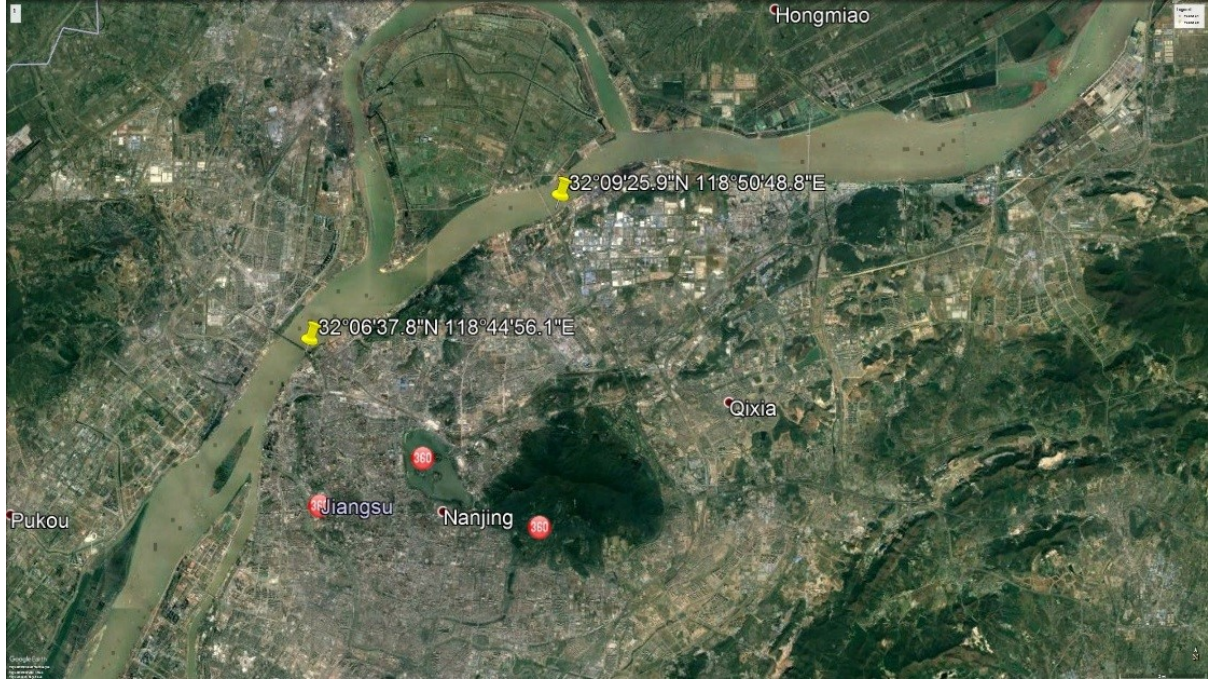

**Fig S1.** Sampling sites along the Yangtze River. The Yellow pins represent latitude: 32°06'37.8"N and longitude: 118°44'56.1"E and latitude: 32°09'25.9"N and longitude: 118°50'48.8"E



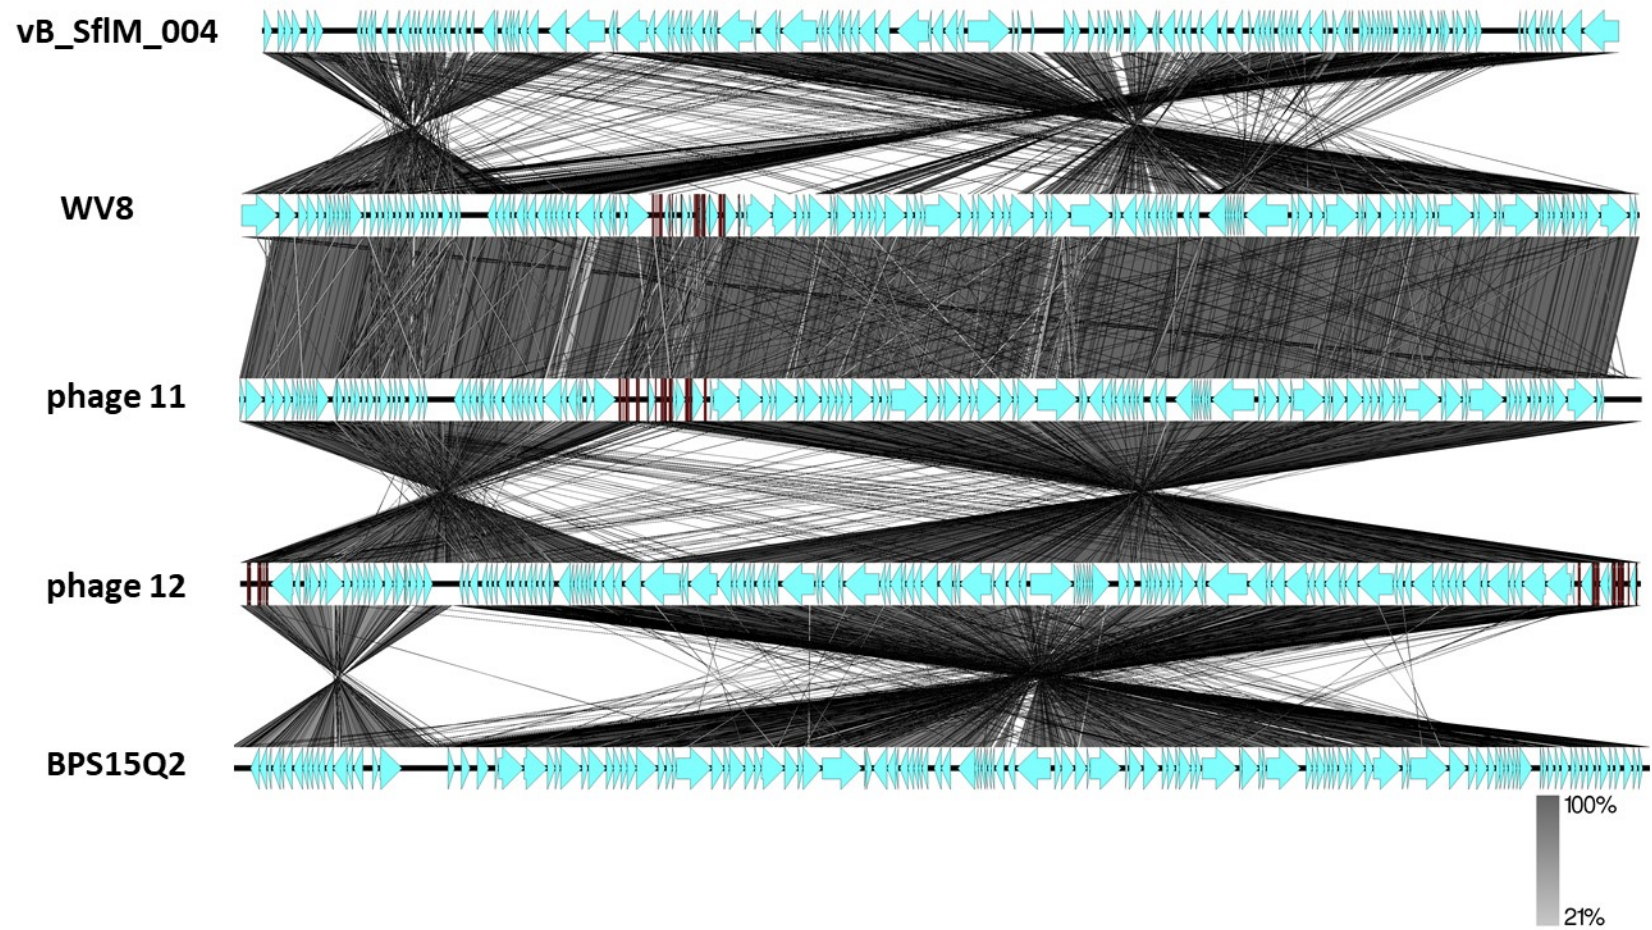

**Fig S2.** BLASTp comparison of *Shigella* vB\_SflM\_004 and the most closet phages. The figure was constructed using EasyFig.

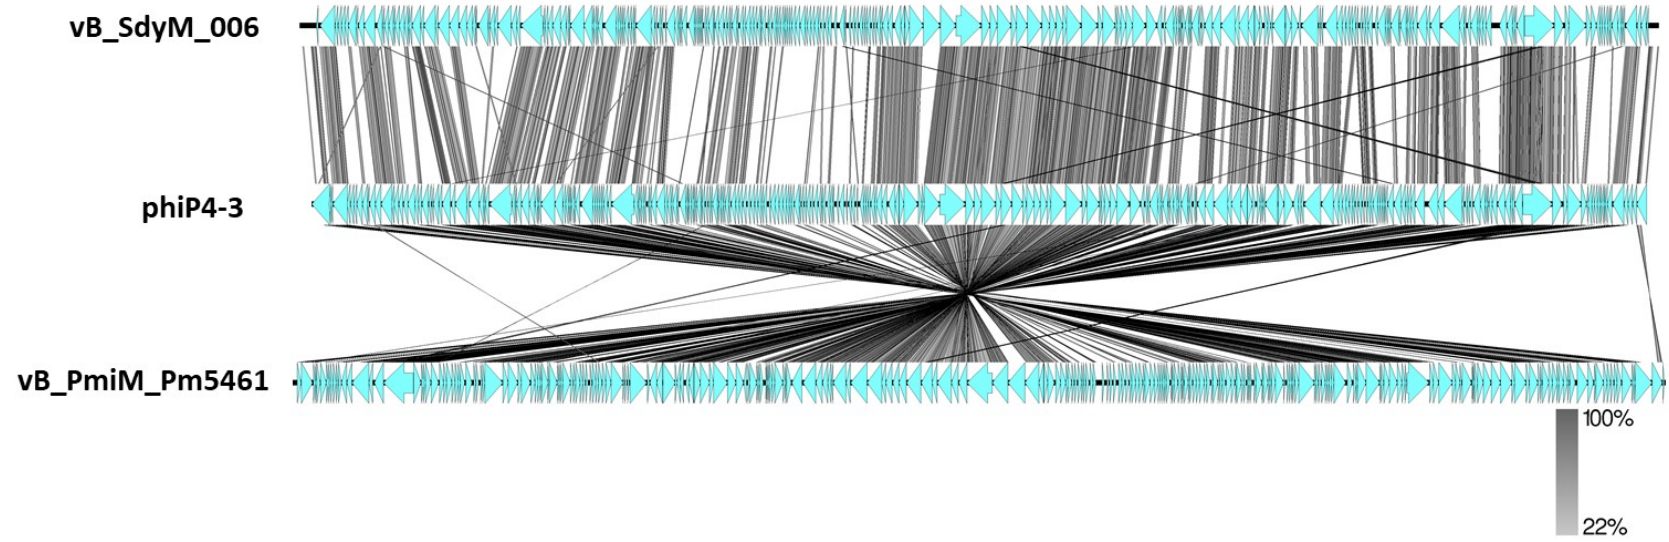

**Fig S3.** BLASTp comparison of *Shigella* vB\_SdyM\_006 and the most closet phages. The figure was constructed using EasyFig

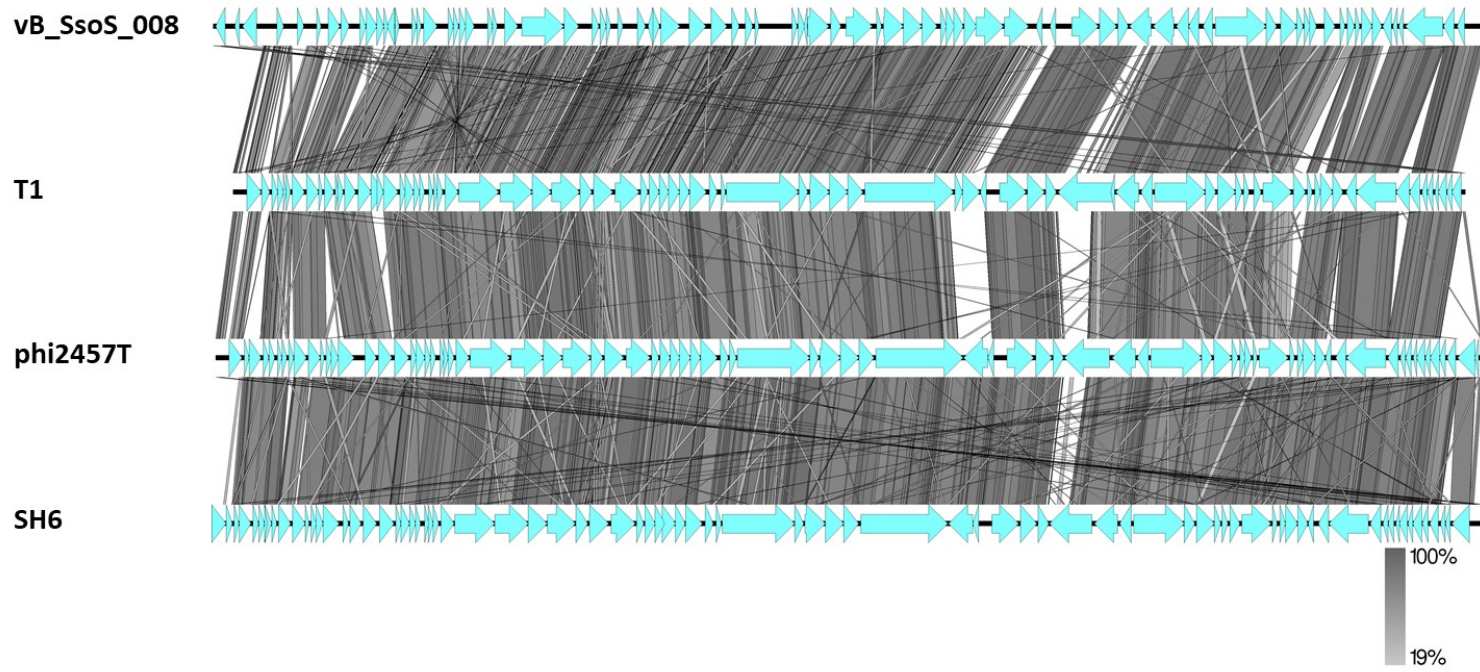

**Fig S4.** BLASTp comparison of Shigella vB\_SsoS\_008 and the most closet phages. The figure was constructed using EasyFig.
