# Supplementary material for: Biodiversity of New Lytic Bacteriophages Infecting Shigella spp. in Freshwater Environment
Source: PubMed Central journal article supplement (PMC7925395; doi:10.3389/fmicb.2021.619323), 2021-02-17
Supplement: Data_Sheet_2.pdf [file Data_Sheet_2.pdf]

## Promotor of phage vB\_SflM\_004

|           | <b>position</b> | <b>-10</b> | <b>-35</b> |
|-----------|-----------------|------------|------------|
| <b>1</b>  | 44640           | TTTTATAAT  | TTGACA     |
| <b>2</b>  | 58710           | AGGTATTAT  | TTGAGA     |
| <b>3</b>  | 52297           | TTTTATACT  | TTGACA     |
| <b>4</b>  | 61088           | TCATATAAT  | TTGATT     |
| <b>5</b>  | 36774           | TTTTATTCT  | TTTACT     |
| <b>6</b>  | 7194            | TTTTAGAAT  | TTGATA     |
| <b>7</b>  | 70277           | TTTTATTAT  | TTTATA     |
| <b>8</b>  | 73900           | TTGTATGAT  | TTGACA     |
| <b>9</b>  | 69409           | TTTTAAAAT  | TTGAAA     |
| <b>10</b> | 81365           | GGTTATAAT  | TTGACC     |
| <b>11</b> | 73309           | AGTTATAGT  | TTAAAA     |
| <b>12</b> | 16863           | CTGTATCTT  | TTAACT     |
| <b>13</b> | 80644           | TTTTAGATT  | TTGATT     |
| <b>14</b> | 50750           | AACTAAAGT  | TTTACA     |
| <b>15</b> | 76849           | GATTAAAGT  | TTGATT     |
| <b>16</b> | 63223           | TGCTAAGAT  | TTCACA     |

## Promotor of phage vB\_SdyM\_006

|           | <b>position</b> | <b>-10</b> |  | <b>-35</b> |
|-----------|-----------------|------------|--|------------|
| <b>1</b>  | 7199            | TTTTATAAT  |  | TTGTAA     |
| <b>2</b>  | 13495           | TGCTATAAT  |  | TTCTAG     |
| <b>3</b>  | 23291           | TGTTATTAT  |  | TTCAAA     |
| <b>4</b>  | 24211           | AATTATAAT  |  | TTTTAA     |
| <b>5</b>  | 32593           | CATTATAAT  |  | TTAAAG     |
| <b>6</b>  | 40886           | TTCTATAAT  |  | TTAAAA     |
| <b>7</b>  | 43510           | TAGTATAAT  |  | TTGTAG     |
| <b>8</b>  | 44855           | CCTTATAAT  |  | TTTAAG     |
| <b>9</b>  | 46330           | CCTTATAAT  |  | TTGTAA     |
| <b>10</b> | 47337           | TGATATAAT  |  | TTGTAA     |
| <b>11</b> | 49343           | GTTTATGAT  |  | TTGCAT     |
| <b>12</b> | 57794           | GGTGATAAT  |  | TTAAAT     |
| <b>13</b> | 59163           | TTTTATCAT  |  | TTCCAG     |
| <b>14</b> | 59564           | CACTATTAT  |  | TTGTAA     |
| <b>15</b> | 60649           | ATTCATAAT  |  | TTGAAT     |
| <b>16</b> | 62984           | TGGTATAAT  |  | TTTCAA     |
| <b>17</b> | 66585           | ATGTATAAT  |  | TTTAAT     |
| <b>18</b> | 68320           | AATTATAAT  |  | TTGTAT     |
| <b>19</b> | 90708           | TTATATAAT  |  | TTAAAA     |
| <b>20</b> | 108854          | CGGTATAAT  |  | TTCAAG     |
| <b>21</b> | 110236          | TGATATTAT  |  | TTTAAT     |
| <b>22</b> | 116646          | TAGTATAAT  |  | TTGTAA     |
| <b>23</b> | 120480          | TGTTATAAT  |  | TTTAAT     |
| <b>24</b> | 126715          | TTTTATAAT  |  | TTTAAT     |
| <b>25</b> | 129414          | ATCTATAAT  |  | TTTAAA     |
| <b>26</b> | 130580          | CTGTATGAT  |  | TTAAAT     |
| <b>27</b> | 133173          | CATTATAAT  |  | TTGCAA     |
| <b>28</b> | 142336          | TATTATTAT  |  | TTTCAG     |
| <b>29</b> | 144627          | TTATATAAT  |  | TTGGAT     |
| <b>30</b> | 154613          | ATATATAAT  |  | TTTAAT     |
| <b>31</b> | 161520          | TGATATGAT  |  | TTCTAT     |

## Promotor of phage vB\_SsoS\_008

|           | <b>position</b> | <b>-10</b> | <b>-35</b> |
|-----------|-----------------|------------|------------|
| <b>1</b>  | 6467            | ATGTAACAT  | TTGCGA     |
| <b>2</b>  | 7769            | GTCTATGAT  | TTGCTA     |
| <b>3</b>  | 10884           | TTGTATAAT  | TTCCAA     |
| <b>4</b>  | 15294           | CTCTAGGAT  | TTGCAA     |
| <b>5</b>  | 17696           | GTTTAATAT  | TTGCAA     |
| <b>6</b>  | 21050           | CTATATGAT  | TTCCCA     |
| <b>7</b>  | 26544           | CTGTAGAAT  | TTGCGA     |
| <b>8</b>  | 38117           | TTCTAAGAT  | TTCCTA     |
| <b>9</b>  | 39685           | GTGTATTAT  | TTGCTA     |
| <b>10</b> | 42929           | GTTTAAAAT  | TTCCCA     |
| <b>11</b> | 48741           | GTTTAATAT  | TTGCTA     |
| <b>12</b> | 49049           | TTTAAACAT  | TTTCAA     |
