# Supplementary material for: Biodiversity of New Lytic Bacteriophages Infecting Shigella spp. in Freshwater Environment
Source: PubMed Central journal article supplement (PMC7925395; doi:10.3389/fmicb.2021.619323), 2021-02-17
Supplement: Data_Sheet_3.pdf [file Data_Sheet_3.pdf]

The predicted ORFs of phage **vB\_SfIM\_004**, their putative function and conserved domain

|    | CDS_POSITION | Strand | Best BLAST hit (organism)                                | Coverage (%) | E-value   | Identity (%) |                | Conserved domain  |
|----|--------------|--------|----------------------------------------------------------|--------------|-----------|--------------|----------------|-------------------|
| 1  | 120..623     | +      | hypothetical protein [Salmonella phage FSL SP-107]       | 100%         | 2.00E-120 | 98%          | AGF89482.1     |                   |
| 2  | 1008..1430   | +      | hypothetical protein [Escherichia phage wV8]             | 100%         | 2.00E-95  | 96%          | YP_002922811.1 |                   |
| 3  | 1420..1884   | +      | hypothetical protein [Salmonella phage FSL SP-107]       | 100%         | 1.00E-104 | 95%          | AGF89485.1     |                   |
| 4  | 1898..2446   | +      | hypothetical protein [Escherichia phage vB_EcoM-VpaE1]   | 100%         | 7.00E-125 | 93%          | YP_009147295.1 |                   |
| 5  | 2846..3310   | +      | hypothetical protein [Escherichia phage JH2]             | 100%         | 1.00E-105 | 96%          | YP_009219568.1 |                   |
| 6  | 3324..3872   | +      | hypothetical protein [Escherichia phage vB_EcoM_Alf5]    | 100%         | 7.00E-131 | 97%          | YP_009288208.1 |                   |
| 7  | 5997..6245   | -      | hypothetical protein [Salmonella phage FSL SP-107]       | 100%         | 2.00E-54  | 98%          | AGF89487.1     |                   |
| 8  | 6314..6577   | -      | hypothetical protein [Escherichia phage wV8]             | 100%         | 1.00E-53  | 95%          | YP_002922807.1 |                   |
| 9  | 6639..6959   | -      | hypothetical protein [Escherichia phage HY02]            | 86%          | 5.00E-40  | 73%          | YP_009204928.1 |                   |
| 10 | 6922..7179   | -      | hypothetical protein [Enterobacteria phage KhF1]         | 97%          | 6.00E-44  | 86%          | ANZ51930.1     |                   |
| 11 | 7530..7946   | -      | hypothetical protein [PHAGE_Escher_HY02]                 |              |           |              |                |                   |
| 12 | 8467..8700   | -      | hypothetical protein [PHAGE_Escher_vB_EcoM_Alf5]         |              |           |              |                |                   |
| 13 | 8764..9327   | -      | hypothetical protein [PHAGE_Escher_JH2]                  |              |           |              |                |                   |
| 14 | 9413..9661   | -      | hypothetical protein [PHAGE_Escher_phiSUSP2]             |              |           |              |                |                   |
| 15 | 9752..9949   | -      | prohead assembly scaffold protein [PHAGE_Salmon_BPS15Q2] |              |           |              |                |                   |
| 16 | 10050..10457 | -      | hypothetical protein [Salmonella phage BPS17W1]          | 100%         | 1.00E-88  | 96%          | AUM59093.1     |                   |
| 17 | 10546..10818 | -      | hypothetical protein [Salmonella phage FSL SP-012]       | 100%         | 1.00E-61  | 100%         | AGF88919.1     |                   |
| 18 | 10910..11248 | -      | tail tube protein [PHAGE_Salmon_BPS15Q2]                 |              |           |              |                |                   |
| 19 | 11242..11538 | -      | tail sheath monomer [PHAGE_Salmon_BPS15Q2]               |              |           |              |                |                   |
| 20 | 11627..11932 | -      | hypothetical protein [Shigella phage Sf13]               | 100%         | 6.00E-66  | 100%         | ATE85853.1     |                   |
| 21 | 12204..12461 | -      | hypothetical protein [Salmonella phage FSL SP-107]       | 96%          | 1.00E-44  | 89%          | AGF89438.1     |                   |
| 22 | 12553..12933 | -      | hypothetical protein [Escherichia phage JH2]             | 100%         | 7.00E-84  | 95%          | YP_009219453.1 |                   |
| 23 | 13184..13402 | -      | hypothetical protein [Salmonella phage FSL SP-107]       | 94%          | 2.00E-39  | 94%          | AGF89496.1     |                   |
| 24 | 13923..14717 | -      | putative phosphatase [Escherichia phage EC6]             | 100%         | 0         | 97%          | YP_009151369.1 | Macro_Poa cd02901 |
| 25 | 14718..14918 | -      | hypothetical protein [Escherichia phage JH2]             | 100%         | 4.00E-41  | 100%         | YP_009219456.1 |                   |
| 26 | 15142..15468 | -      | tail assembly protein [PHAGE_Salmon_BPS15Q2]             |              |           |              |                |                   |
| 27 | 15478..15747 | -      | hypothetical protein [PHAGE_Escher_vB_EcoM_Alf5]         |              |           |              |                |                   |
| 28 | 15744..15941 | -      | o-spanin [Salmonella phage BPS15Q2]                      | 100%         | 2.00E-38  | 97%          | YP_009324690.2 |                   |
| 29 | 15907..16254 | -      | i-spanin [Salmonella phage Mushroom]                     | 100%         | 2.00E-77  | 97%          | AJF40654.1     |                   |
| 30 | 16307..16771 | -      | hypothetical protein [Escherichia phage HY02]            | 100%         | 1.00E-105 | 99%          | YP_009204908.1 |                   |
| 31 | 16783..17478 | -      | polynucleotide kinase [Salmonella phage Mushroom]        | 100%         | 1.00E-167 | 97%          | AJF40656.1     |                   |
| 32 | 18105..19244 | -      | rIIB protein [Salmonella phage FSL SP-010]               | 100%         | 0         | 96%          | AGF88670.1     | valS PRK14900     |
| 33 | 19324..21696 | -      | rIIA lysis inhibitor [Enterobacteria phage KhF1]         | 100%         | 0         | 98%          | ANZ51857.1     | HtpG COG0326      |
| 34 | 21920..22255 | -      | hypothetical protein [Escherichia phage HY02]            | 100%         | 6.00E-76  | 100%         | YP_009205027.1 |                   |

|    |              |   |                                                                 |      |           |      |                |                  |           |
|----|--------------|---|-----------------------------------------------------------------|------|-----------|------|----------------|------------------|-----------|
| 35 | 22252..22467 | - | DNA polymerase [Salmonella phage SHP1]                          | 64%  | 2.00E-03  | 42%  | ASJ79448.1     |                  |           |
| 36 | 22521..24335 | - | nicotinate phosphoribosyltransferase [Escherichia phage vB_E    | 100% | 0         | 97%  | YP_009200868.1 | nadV             | PHA02594  |
| 37 | 24354..24845 | - | HNH endonuclease [Salmonella phage Meda]                        | 100% | 1.00E-115 | 98%  | AXY86265.1     |                  |           |
| 38 | 24854..25735 | - | putative ribose-phosphate pyrophosphokinase [Escherichia phage  | 100% | 0         | 97%  | YP_009288313.1 | PrsA             | COG0462   |
| 39 | 25748..26026 | - | hypothetical protein [Escherichia phage EC6]                    | 100% | 8.00E-63  | 100% | YP_009151351.1 |                  |           |
| 40 | 26019..26534 | - | hypothetical protein [Escherichia phage vB_EcoM_AYO145A]        | 100% | 1.00E-122 | 97%  | YP_009200865.1 |                  |           |
| 41 | 26586..26906 | - | hypothetical protein [Escherichia phage EC6]                    | 100% | 3.00E-68  | 98%  | YP_009151349.1 |                  |           |
| 42 | 26909..27166 | - | hypothetical protein [Escherichia phage wV8]                    | 100% | 2.00E-53  | 100% | YP_002922914.1 |                  |           |
| 43 | 27133..27921 | - | anaerobic nucleoside-triphosphate reductase subunit [Salmonella | 57%  | 6.00E-107 | 99%  | AJF40541.1     | NrdG             | TIGR02491 |
| 44 | 27982..28377 | - | tail tube protein [PHAGE_Escher_vB_EcoM_Alf5]                   | 100% | 2.00E-91  | 98%  | YP_009288305.1 |                  |           |
| 45 | 28421..28693 | - | hypothetical protein [Shigella phage Sf17]                      | 87%  | 3.00E-23  | 66%  | AUV62969.1     |                  |           |
| 46 | 28669..28824 | - | unknown [Salmonella phage FelixO1]                              | 100% | 3.00E-24  | 90%  | AAQ14733.1     |                  |           |
| 47 | 28848..30992 | - | anaerobic ribonucleoside-triphosphate reductase [Escherichia c  | 100% | 0         | 99%  | WP_113809211.1 | NrdD             | TIGR02487 |
| 48 | 31041..31247 | - | unknown                                                         | 100% | 6.00E-39  | 100% | WP_113809212.1 |                  |           |
| 49 | 31482..32555 | - | ribonucleoside triphosphate reductase beta chain [Escherichia p | 100% | 0         | 99%  | YP_009147382.1 | RNRR2            | cd01049   |
| 50 | 32552..32809 | - | hypothetical protein [Escherichia phage JH2]                    | 100% | 2.00E-53  | 95%  | YP_009219484.1 |                  |           |
| 51 | 32865..35099 | - | Ribonucleoside triphosphate reductase, alpha chain [Salmonella  | 100% | 0         | 99%  | NP_944991.1    | ATP-cone         | pfam03477 |
| 52 | 35146..35484 | - | hypothetical protein [Salmonella phage vB_SpUM_SP116]           | 100% | 9.00E-76  | 98%  | YP_009146352.1 |                  |           |
| 53 | 35477..35800 | - | hypothetical protein [Salmonella phage FelixO1]                 | 100% | 9.00E-75  | 100% | NP_944987.2    |                  |           |
| 54 | 35781..36536 | - | phosphoribosyl-ATP pyrophosphohydrolase [Salmonella phage       | 100% | 0         | 98%  | AUM59523.1     | PRA-PH           | pfam01503 |
| 55 | 36529..36759 | - | hypothetical protein [Enterobacteriophage UAB_Phi87]            | 100% | 1.00E-45  | 100% | YP_009150138.1 |                  |           |
| 56 | 36781..37278 | - | NAD synthetase [Salmonella phage BPS15Q2]                       | 100% | 4.00E-118 | 99%  | YP_009324660.1 | GIY-YIG_Scd10444 |           |
| 57 | 37268..37774 | - | HNH endonuclease [Citrobacter phage Mijalis]                    | 95%  | 4.00E-117 | 99%  | ARB06520.1     | HNH_3            | pfam13392 |
| 58 | 37752..38798 | - | putative exodeoxyribonuclease [Escherichia phage wV8]           | 100% | 0         | 97%  | YP_002922895.1 | PHA00439         | PHA00439  |
| 59 | 38861..39718 | - | hypothetical protein [Escherichia phage wV8]                    | 100% | 0         | 99%  | YP_002922894.1 |                  |           |
| 60 | 40193..42178 | - | putative phage DNA primase/helicase [Salmonella phage vB_S      | 100% | 0         | 99%  | YP_009146344.1 | GP4d_helic       | cd01122   |
| 61 | 42171..42365 | - | hypothetical protein [Escherichia phage EC6]                    | 100% | 1.00E-35  | 98%  | YP_009151324.1 |                  |           |
| 62 | 42380..43123 | - | putative deoxynucleotide monophosphate kinase(dNMP) [Enter      | 100% | 4.00E-177 | 97%  | AWD91383.1     | 1                | PHA02575  |
| 63 | 43185..43997 | - | minor tail protein [Salmonella phage BPS17L1]                   | 100% | 0         | 93%  | AUM59533.1     |                  |           |
| 64 | 43999..44421 | - | unknown                                                         | 100% | 1.00E-98  | 100% | WP_015973568.1 |                  |           |
| 65 | 44679..47378 | + | putative DNA polymerase [Escherichia phage vB_EcoM_Alf5]        | 100% | 0         | 99%  | YP_009288280.1 | DNA_pol_Acd08643 |           |
| 66 | 47498..47638 | + | hypothetical protein [Citrobacter phage Moogle]                 | 100% | 2.00E-43  | 100% | YP_009145681.1 |                  |           |
| 67 | 47841..48092 | + | hypothetical protein [Shigella phage Sf15]                      | 60%  | 3.00E-28  | 96%  | ATE85990.1     |                  |           |
| 68 | 48692..48898 | + | hypothetical protein [Citrobacter phage Moogle]                 | 100% | 3.00E-36  | 90%  | YP_009145684.1 |                  |           |
| 69 | 50759..51340 | + | hypothetical protein [Citrobacter phage Moogle]                 | 100% | 1.00E-131 | 93%  | YP_009145686.1 |                  |           |
| 70 | 51343..51783 | + | hypothetical protein [Shigella phage Sf17]                      | 100% | 5.00E-103 | 99%  | AUV62937.1     |                  |           |
| 71 | 52330..52713 | + | hypothetical protein [Citrobacter phage Moogle]                 | 100% | 9.00E-78  | 90%  | YP_009145688.1 | PRK15239         | PRK15239  |
| 72 | 52914..53213 | + | transcriptional regulatory protein [PHAGE_Escher_phiSUSP1]      |      |           |      |                | HTH_37           | pfam13744 |
| 73 | 53340..53570 | + | nucleoside triphosphate hydrolase [PHAGE_Escher_vB_EcoM         | 100% | 3.00E-45  | 92%  | ALA06866.1     |                  |           |

|     |              |   |                                                       |      |           |      |                |             |           |
|-----|--------------|---|-------------------------------------------------------|------|-----------|------|----------------|-------------|-----------|
| 74  | 53555..53947 | + | hypothetical protein [Shigella phage Sf15]            | 93%  | 2.00E-76  | 92%  | ATE86001.1     |             |           |
| 75  | 54100..54381 | + | hypothetical protein [Shigella phage Sf18]            | 84%  | 2.00E-45  | 91%  | ATE86284.1     |             |           |
| 76  | 54345..54548 | + | hypothetical protein [Shigella phage Sf16]            | 100% | 3.00E-35  | 93%  | ATE86206.1     |             |           |
| 77  | 54930..55253 | + | dihydrofolate reductase [Shigella phage Sf18]         | 99%  | 2.00E-59  | 88%  | ATE86282.1     | DHFR        | cd00209   |
| 78  | 55250..56140 | + | thymidylate synthase [Shigella phage Sf16]            | 84%  | 5.00E-173 | 93%  | ATE86203.1     | Thymidylat  | pfam00303 |
| 79  | 56335..56622 | - | putative holin [PHAGE_Escher_phiSUSP1]                |      |           |      |                |             |           |
| 80  | 56622..56801 | - | hypothetical protein [Citrobacter phage Moogle]       | 100% | 8.00E-27  | 84%  | YP_009177305.1 |             |           |
| 81  | 56888..57766 | - | tail fiber protein [Shigella phage Sf19]              | 99%  | 6.00E-115 | 64%  | AUV56273.1     |             |           |
| 82  | 57900..58241 | - | tail fiber protein [PHAGE_Escher_wV8]                 |      |           |      |                | gp37_C      | pfam12604 |
| 83  | 58405..58791 | - | tail fiber protein [PHAGE_Escher_vB_EcoM_AYO145A]     |      |           |      |                |             |           |
| 84  | 59135..59440 | - | tail fiber protein [PHAGE_Escher_phiSUSP1]            |      |           |      |                |             |           |
| 85  | 59486..60481 | - | tail fiber protein [PHAGE_Escher_wV8]                 |      |           |      |                |             |           |
| 86  | 60678..61076 | - | hypothetical protein [Shigella phage Sf15]            | 64%  | 1.00E-55  | 100% | ATE86010.1     |             |           |
| 87  | 61489..62061 | - | baseplate assembly protein [Shigella phage Sf18]      | 83%  | 1.00E-87  | 86%  | ATE86410.1     | Baseplate_J | pfam04865 |
| 88  | 62453..62641 | + | hypothetical protein [Escherichia phage vB_EcoM_Alf5] | 72%  | 7.00E-21  | 94%  | YP_009288277.1 |             |           |
| 89  | 62740..63144 |   | hypothetical protein [Escherichia phage wV8]          | 79%  | 5.00E-70  | 98%  | YP_002922853.1 | DUF3277     | pfam11681 |
| 90  | 63160..63468 | - | hypothetical protein [Shigella phage Sf17]            | 100% | 3.00E-60  | 96%  | AUV62911.1     | DUF3383     | pfam11863 |
| 91  | 63472..63816 | - | tail sheath [Salmonella phage Meda]                   | 97%  | 7.00E-56  | 83%  | AXY86327.1     |             |           |
| 92  | 63818..64054 | - | tail sheath [Salmonella phage Meda]                   | 75%  | 1.00E-15  | 69%  | AXY86327.1     |             |           |
| 93  | 64269..64556 | - | hypothetical protein [Citrobacter phage Moogle]       | 77%  | 8.00E-46  | 96%  | YP_009145715.1 |             |           |
| 94  | 64553..64828 | - | hypothetical protein [Shigella phage Sf13]            | 100% | 8.00E-57  | 96%  | ATE85807.1     |             |           |
| 95  | 64859..65170 | - | hypothetical protein [Citrobacter phage Moogle]       | 97%  | 4.00E-59  | 91%  | YP_009145717.1 |             |           |
| 96  | 65192..65542 | - | major capsid protein [Shigella phage Sf13]            | 100% | 4.00E-68  | 89%  | ATE85809.1     | Phage_cap_  | pfam03864 |
| 97  | 65717..66334 | - | major capsid protein [Shigella phage Sf18]            | 58%  | 1.00E-71  | 94%  | ATE86394.1     | Phage_cap_  | pfam03864 |
| 98  | 66347..67174 | - | head maturation protease [Citrobacter phage Michonne] | 100% | 0         | 95%  | YP_009177327.1 | S49_Sppa_   | cd07022   |
| 99  | 67306..67497 | + | hypothetical protein [Escherichia phage wV8]          | 100% | 1.00E-40  | 100% | YP_002922880.1 |             |           |
| 100 | 67776..68045 | + | hypothetical protein [Salmonella virus VSe11]         | 87%  | 9.00E-52  | 99%  | AUE22370.1     |             |           |
| 101 | 68035..68586 | - | hypothetical protein [Shigella phage Sf13]            | 96%  | 2.00E-121 | 98%  | ATE85819.1     |             |           |
| 102 | 68663..68842 | - | hypothetical protein [Shigella phage Sf13]            | 100% | 2.00E-23  | 81%  | ATE85820.1     |             |           |
| 103 | 68839..69033 | - | hypothetical protein [Shigella phage Sf13]            | 93%  | 6.00E-33  | 95%  | ATE85820.1     |             |           |
| 104 | 69426..69659 | + | hypothetical protein [Escherichia phage SUSP1]        | 100% | 2.00E-46  | 94%  | YP_009199379.1 |             |           |
| 105 | 69653..70021 | + | hypothetical protein [Shigella phage Sf15]            | 94%  | 2.00E-73  | 95%  | ATE86040.1     |             |           |
| 106 | 70018..70239 | + | hypothetical protein [Shigella phage Sf13]            | 100% | 4.00E-43  | 100% | ATE85822.1     |             |           |
| 107 | 70286..70630 | + | hypothetical protein [Shigella phage Sf18]            | 99%  | 9.00E-71  | 89%  | ATE86380.1     |             |           |
| 108 | 70627..70881 | + | tail protein [Shigella phage Sf16]                    | 97%  | 1.00E-50  | 95%  | ATE86165.1     |             |           |
| 109 | 70888..71136 | + | tail protein [Shigella phage Sf13]                    | 48%  | 6.00E-13  | 78%  | ATE85824.1     |             |           |
| 110 | 71164..71382 | + | tail protein [Shigella phage Sf13]                    | 44%  | 1.00E-05  | 75%  | ATE85824.1     |             |           |
| 111 | 71400..71615 | + | lysozyme [Shigella phage Sf15]                        | 97%  | 2.00E-33  | 87%  | ATE86043.1     | RrrD        | COG3772   |
| 112 | 71905..72303 | + | hypothetical protein [Shigella phage Sf18]            | 100% | 2.00E-81  | 86%  | ATE86377.1     |             |           |

|     |              |   |                                                            |      |           |      |                |            |           |
|-----|--------------|---|------------------------------------------------------------|------|-----------|------|----------------|------------|-----------|
| 113 | 72296..72625 | + | hypothetical protein [Shigella phage Sf13]                 | 82%  | 1.00E-42  | 78%  | ATE85827.1     |            |           |
| 114 | 72671..72964 | + | hypothetical protein [Citrobacter phage Moogle]            | 100% | 1.00E-59  | 95%  | YP_009145737.1 |            |           |
| 115 | 72957..73301 | + | hypothetical protein [Citrobacter phage Michonne]          | 100% | 9.00E-61  | 82%  | YP_009177347.1 |            |           |
| 116 | 73303..73461 | + | hypothetical protein [Shigella phage Sf15]                 | 92%  | 2.00E-16  | 75%  | ATE86048.1     |            |           |
| 117 | 73445..73783 | + | hypothetical protein [Shigella phage Sf13]                 | 90%  | 9.00E-56  | 83%  | ATE85830.1     |            |           |
| 118 | 73969..74358 | + | hypothetical protein [Shigella phage Sf16]                 | 96%  | 2.00E-65  | 75%  | ATE86158.1     |            |           |
| 119 | 74441..74635 | + | hypothetical protein [Shigella phage Sf15]                 | 100% | 4.00E-37  | 98%  | ATE86049.1     |            |           |
| 120 | 74640..74813 | + | hypothetical protein [Shigella phage Sf13]                 | 94%  | 1.00E-25  | 83%  | ATE85832.1     |            |           |
| 121 | 74810..75196 | + | hypothetical protein [Shigella phage Sf15]                 | 99%  | 2.00E-70  | 82%  | ATE86156.1     |            |           |
| 122 | 75379..75609 | + | hypothetical protein [Escherichia phage EC6]               | 73%  | 1.00E-20  | 77%  | YP_009151248.1 | Pathogen_b | pfam09593 |
| 123 | 75653..76096 | + | hypothetical protein [Shigella phage Sf15]                 | 100% | 1.00E-102 | 100% | ATE86054.1     |            |           |
| 124 | 76201..76395 | + | hypothetical protein [Shigella phage Sf13]                 | 100% | 8.00E-32  | 88%  | ATE85836.1     |            |           |
| 125 | 76382..76846 | + | hypothetical protein [Shigella phage Sf15]                 | 100% | 1.00E-111 | 100% | ATE86056.1     |            |           |
| 126 | 76849..77214 | + | hypothetical protein [Shigella phage Sf14]                 | 93%  | 7.00E-51  | 78%  | AUV62746.1     |            |           |
| 127 | 79530..79652 | - | hypothetical protein [Shigella phage Sf13]                 | 100% | 1.00E-49  | 93%  | ATE85839.1     |            |           |
| 128 | 79824..80036 | - | hypothetical protein [Citrobacter phage Moogle]            | 100% | 4.00E-40  | 96%  | YP_009145747.1 |            |           |
| 129 | 80102..80629 | - | hypothetical protein [Escherichia phage SUSP1]             | 100% | 6.00E-74  | 63%  | YP_009199360.1 |            |           |
| 130 | 80829..81011 | - | hypothetical protein [Enterobacteria phage vB_EcoM_IME338] | 56%  | 1.00E-09  | 85%  | AWD91315.1     |            |           |
| 131 | 81032..81373 | - | hypothetical protein [Citrobacter phage Moogle]            | 100% | 4.00E-80  | 99%  | YP_009145749.1 |            |           |
| 132 | 81459..81656 | - | hypothetical protein [Shigella phage Sf13]                 | 100% | 2.00E-40  | 100% | ATE85844.1     |            |           |
| 133 | 81748..82284 | - | hypothetical protein [Shigella phage Sf13]                 | 55%  | 2.00E-62  | 99%  | ATE85845.1     |            |           |
| 134 | 82385..83506 | - | putative rIIb protein [Escherichia phage SUSP1]            | 100% | 0         | 99%  | YP_009199333.1 |            |           |
| 135 | 83596..85887 | - | rIIA protein [Escherichia phage vB_EcoM_AYO145A]           | 100% | 0         | 100% | YP_009200740.1 | HtpG       | COG0326   |

The predicted ORFs of phage vB\_SdyM\_006 , their putative function and conserved domain

|    | CDS_POSITION  | Strand | aa  | PI   | Mw (Kda) | Best BLAST hit (organism)                                     | Coverage | E value   | Identity (%) | Conserved domain |          |           |
|----|---------------|--------|-----|------|----------|---------------------------------------------------------------|----------|-----------|--------------|------------------|----------|-----------|
| 1  | 2046....2258  | -      | 70  | 4.97 | 8.2      | hypothetical protein [Proteus phage phiP4-3]                  | 100%     | 3.00E-41  | 99%          | AUM58625.1       |          |           |
| 2  | 2483...4306   | -      | 607 | 6.39 | 68.4     | DNA topoisomerase subunit [Morganella phage vB]               | 99%      | 0         | 70%          | YP_009279861.1   | gyrB     | TIGR01059 |
| 3  | 4321...4659   | -      | 112 | 6.9  | 13.8     | hypothetical protein [Proteus phage phiP4-3]                  | 100%     | 6.00E-78  | 100%         | AUM58621.1       |          |           |
| 4  | 4708...5100   | -      | 130 | 5.19 | 15.3     | hypothetical protein [Proteus phage phiP4-3]                  | 100%     | 2.00E-89  | 100%         | AUM58620.1       |          |           |
| 5  | 5103...5531   | -      | 142 | 4.71 | 16.6     | hypothetical protein [Proteus phage phiP4-3]                  | 100%     | 5.00E-98  | 100%         | AUM58619.1       |          |           |
| 6  | 5534...5947   | -      | 137 | 5    | 15.7     | hypothetical protein [Proteus phage PM2]                      | 99%      | 2.00E-23  | 41%          | ASZ76532.1       |          |           |
| 7  | 5944...6885   | -      | 313 | 4.64 | 35.7     | hypothetical protein [Proteus phage PM2]                      | 100%     | 1.00E-122 | 60%          | ASZ76533.1       |          |           |
| 8  | 6890...7105   | -      | 70  | 5.19 | 8.2      | hypothetical protein [Proteus phage PM2]                      | 94%      | 3.00E-26  | 71%          | ASZ76534.1       |          |           |
| 9  | 7181...7861   | -      | 226 | 5.12 | 26.1     | exonuclease A [Proteus phage phiP4-3]                         | 100%     | 3.00E-164 | 99%          | AUM58615.1       | DUF5051  | pfam16473 |
| 10 | 7861...9183   | -      | 440 | 6.44 | 50.8     | DNA helicase [Proteus phage PM2]                              | 100%     | 0         | 93%          | ASZ76536.1       | TraA_Ti  | TIGR02768 |
| 11 | 9430...10089  | -      | 219 | 9.87 | 25.3     | anti-sigma factor [Proteus phage phiP4-3]                     | 100%     | 1.00E-149 | 96%          | AUM58613.1       |          |           |
| 12 | 10146...10340 | -      | 64  | 9.16 | 7.4      | hypothetical protein [Proteus phage phiP4-3]                  | 100%     | 2.00E-37  | 100%         | AUM58612.1       | ICE_PFG  | TIGR03764 |
| 13 | 10340...10864 | -      | 174 | 4.86 | 20.1     | dCTP pyrophosphatase [Proteus phage phiP4-3]                  | 100%     | 3.00E-127 | 100%         | AUM58611.1       | dUTPase  | pfam08761 |
| 14 | 10873...11436 | -      | 187 | 4.89 | 22.0     | hypothetical protein [Proteus phage phiP4-3]                  | 100%     | 2.00E-133 | 97%          | AUM58610.1       |          |           |
| 15 | 11436...11651 | -      | 70  | 8.76 | 8.1      | hypothetical protein [Proteus phage phiP4-3]                  | 100%     | 9.00E-45  | 100%         | AUM58609.1       |          |           |
| 16 | 11644...12201 | -      | 185 | 4.93 | 21.2     | hypothetical protein [Proteus phage phiP4-3]                  | 100%     | 3.00E-31  | 42%          | AUM58608.1       |          |           |
| 17 | 12201...12776 | -      | 191 | 4.59 | 21.8     | hypothetical protein [Proteus phage vB_PmiM_Pm5]              | 95%      | 8.00E-16  | 30%          | YP_009195438.1   | MIB_HE   | pfam06701 |
| 18 | 12787...13239 | -      | 150 | 5.11 | 17.0     | hypothetical protein [Proteus phage phiP4-3]                  | 98%      | 2.00E-76  | 80%          | AUM58607.1       |          |           |
| 19 | 13239...13424 | -      | 61  | 4.17 | 7.0      | hypothetical protein [Proteus phage vB_PmiM_Pm5]              | 98%      | 1.00E-18  | 77%          | YP_009195442.1   |          |           |
| 20 | 13411...13740 | -      | 109 | 4.81 | 12.7     | hypothetical protein [Proteus phage vB_PmiM_Pm5]              | 97%      | 6.00E-34  | 60%          | YP_009195443.1   |          |           |
| 21 | 13743...14762 | -      | 339 | 8.2  | 39.4     | DNA primase subunit [Proteus phage vB_PmiM_Pm5]               | 100%     | 0         | 99%          | YP_009195444.1   | DnaG     | COG0358   |
| 22 | 14810...15181 | -      | 123 | 6.3  | 13.9     | hypothetical protein [Proteus phage phiP4-3]                  | 100%     | 1.00E-84  | 100%         | AUM58602.1       |          |           |
| 23 | 15178...16599 | -      | 473 | 5.62 | 53.2     | DNA primase/helicase [Proteus phage PM2]                      | 100%     | 0         | 96%          | ASZ76292.1       | phage_D  | TIGR03600 |
| 24 | 16599...16922 | -      | 107 | 4.87 | 12.5     | head vertex assembly chaperone [Proteus phage phiP4-3]        | 100%     | 1.00E-69  | 100%         | AUM58600.1       | Phage_hd | pfam11113 |
| 25 | 16909...18288 | -      | 459 | 9.26 | 53.2     | putative Hef-like homing endonuclease [Proteus phage phiP4-3] | 100%     | 0         | 83%          | ASZ76294.1       |          |           |
| 26 | 18285...19436 | -      | 383 | 5.51 | 42.9     | RecA-like recombinase protein [Proteus phage phiP4-3]         | 100%     | 0         | 99%          | AUM58598.1       | recA     | PRK09519  |
| 27 | 19491...20405 | -      | 304 | 5.1  | 36.1     | hypothetical protein [Proteus phage PM2]                      | 100%     | 0         | 87%          | ASZ76299.1       |          |           |
| 28 | 20416...21108 | -      | 230 | 5.04 | 26.9     | hypothetical protein [Proteus phage phiP4-3]                  | 100%     | 1.00E-171 | 100%         | AUM58596.1       | TS_Pyrin | cd00351   |
| 29 | 21105...21479 | -      | 124 | 9.3  | 14.3     | hypothetical protein [Proteus phage PM2]                      | 90%      | 2.00E-39  | 62%          | ASZ76301.1       |          |           |
| 30 | 21479...21664 | -      | 61  | 9.46 | 7.0      | hypothetical protein [Proteus phage phiP4-3]                  | 100%     | 7.00E-36  | 100%         | AUM58594.1       |          |           |
| 31 | 21848...23014 | -      | 388 | 6.24 | 45.2     | peptidase [Proteus phage phiP4-3]                             | 100%     | 0         | 100%         | AUM58592.1       | PrtC     | COG0826   |
| 32 | 23053...23259 | -      | 68  | 9.52 | 7.4      | hypothetical protein [Proteus phage phiP4-3]                  | 100%     | 2.00E-37  | 99%          | AUM58591.1       |          |           |
| 33 | 23256...23819 | -      | 187 | 5.72 | 21.7     | hypothetical protein [Proteus phage vB_PmiM_Pm5]              | 99%      | 2.00E-103 | 76%          | YP_009195458.1   | Tmk      | COG0125   |
| 34 | 23816...24193 | -      | 125 | 5.91 | 14.4     | hypothetical protein [Proteus phage phiP4-3]                  | 100%     | 8.00E-88  | 99%          | AUM58589.1       |          |           |

|    |               |   |     |      |       |                                                       |      |           |      |                |           |           |
|----|---------------|---|-----|------|-------|-------------------------------------------------------|------|-----------|------|----------------|-----------|-----------|
| 35 | 24190...25839 | - | 549 | 6.23 | 63.1  | hypothetical protein [Proteus phage phiP4-3]          | 100% | 0         | 99%  | AUM58588.1     |           |           |
| 36 | 25887...26519 | - | 210 | 6.64 | 23.0  | hypothetical protein [Escherichia phage vB_EcoM_      | 98%  | 2.00E-104 | 71%  | YP_009037454.1 | SIS       | pfam01380 |
| 37 | 26520...26969 | - | 149 | 9.39 | 17.1  | hypothetical protein [Proteus phage phiP4-3]          | 99%  | 2.00E-105 | 100% | AUM58586.1     | TBCC_N    | pfam16752 |
| 38 | 27025...29736 | - | 903 | 5.99 | 104.6 | DNA polymerase [Proteus phage phiP4-3]                | 100% | 0         | 99%  | AUM58585.1     | POLBc     | cd00145   |
| 39 | 29791...29988 | - | 65  | 6.13 | 7.7   | hypothetical protein [Proteus phage phiP4-3]          | 100% | 1.00E-39  | 97%  | AUM58584.1     |           |           |
| 40 | 29990...30355 | - | 121 | 9.06 | 14.4  | translational repressor protein [Proteus phage vB_P   | 100% | 1.00E-78  | 96%  | YP_009195464.1 | Translat  | pfam01818 |
| 41 | 30358...30930 | - | 190 | 5.76 | 22.4  | DNA polymerase accessory protein clamp loader su      | 100% | 6.00E-138 | 100% | AUM58582.1     | Phage_cl  | pfam16790 |
| 42 | 30923...31885 | - | 320 | 8.14 | 36.1  | DNA polymerase accessory protein clamp loader su      | 100% | 0         | 100% | AUM58581.1     | RarA      | COG2256   |
| 43 | 31900...32580 | - | 226 | 4.91 | 25.2  | sliding clamp [Proteus phage vB_PmiM_Pm5461]          | 100% | 4.00E-156 | 95%  | YP_009195467.1 | gp45-slid | pfam09116 |
| 44 | 32590...32904 | - | 104 | 9.55 | 12.1  | RNA polymerase binding protein [Proteus phage ph      | 100% | 1.00E-67  | 100% | AUM58579.1     | Phage_R   | pfam10789 |
| 45 | 32897...33079 | - | 60  | 4.75 | 7.4   | hypothetical protein [Proteus phage phiP4-3]          | 100% | 1.00E-36  | 100% | AUM58578.1     |           |           |
| 46 | 33076...34761 | - | 560 | 7.15 | 63.9  | recombination endonuclease subunit [Proteus phage     | 100% | 0         | 100% | AUM58577.1     | 46        | PHA02562  |
| 47 | 34761...35780 | - | 339 | 5.04 | 39.0  | recombination endonuclease subunit [Morganella ph     | 98%  | 8.00E-172 | 68%  | YP_009279901.1 | sbcd      | TIGR00619 |
| 48 | 35795...35980 | - | 61  | 9.74 | 7.2   | hypothetical protein [Proteus phage phiP4-3]          | 100% | 2.00E-36  | 100% | AUM58575.1     |           |           |
| 49 | 35958...36287 | - | 109 | 8.52 | 12.9  | hypothetical protein [Proteus phage phiP4-3]          | 100% | 4.00E-70  | 100% | AUM58574.1     | DUF2654   | pfam10849 |
| 50 | 36280...36483 | - | 67  | 3.91 | 8.2   | hypothetical protein PS2_065 [Serratia phage PS2]     | 73%  | 1.00E-08  | 53%  | YP_009030112.1 |           |           |
| 51 | 36476...37024 | - | 182 | 4.86 | 21.3  | sigma factor for late transcription [Proteus phage ph | 97%  | 1.00E-113 | 96%  | AUM58573.1     | 55        | PHA02547  |
| 52 | 37236...38657 | - | 473 | 8.54 | 54.5  | hypothetical protein [Proteus phage phiP4-3]          | 100% | 0         | 99%  | AUM58572.1     |           |           |
| 53 | 38657...38962 | - | 101 | 9.48 | 11.7  | hypothetical protein [Proteus phage phiP4-3]          | 100% | 3.00E-67  | 100% | AUM58571.1     | PHA0210   | PHA02100  |
| 54 | 38955...39233 | - | 92  | 5.29 | 10.6  | hypothetical protein [Proteus phage PM2]              | 100% | 6.00E-49  | 82%  | ASZ76324.1     | arsC_rela | TIGR01617 |
| 55 | 39230...39466 | - | 78  | 4.94 | 9.3   | hypothetical protein [Proteus phage phiP4-3]          | 100% | 5.00E-51  | 100% | AUM58569.1     |           |           |
| 56 | 39468...39710 | - | 80  | 4.09 | 9.4   | hypothetical protein [Proteus phage phiP4-3]          | 100% | 2.00E-51  | 100% | AUM58568.1     |           |           |
| 57 | 39719...40195 | - | 158 | 5.49 | 18.3  | anaerobic NTP reductase small subunit [Proteus pha    | 100% | 2.00E-113 | 100% | AUM58567.1     | nrdG      | PRK11121  |
| 58 | 40234...40566 | - | 110 | 9.28 | 12.8  | hypothetical protein [Proteus phage phiP4-3]          | 100% | 2.00E-73  | 97%  | AUM58566.1     |           |           |
| 59 | 40576...40839 | - | 87  | 5.15 | 10.0  | hypothetical protein [Proteus phage phiP4-3]          | 100% | 3.00E-57  | 99%  | AUM58565.1     |           |           |
| 60 | 40850...41041 | - | 63  | 4.78 | 7.6   | hypothetical protein [Proteus phage phiP4-3]          | 100% | 2.00E-36  | 98%  | AUM58564.1     |           |           |
| 61 | 41085...42956 | - | 623 | 5.80 | 70.2  | anaerobic NTP reductase large subunit [Proteus pha    | 100% | 0         | 99%  | AUM58563.1     | RNR_III   | cd01675   |
| 62 | 42953...43423 | - | 156 | 9.1  | 18.2  | recombinase endonuclease VII [Proteus phage phiP      | 100% | 5.00E-110 | 99%  | AUM58562.1     | Endonuc   | pfam02945 |
| 63 | 43463...43717 | - | 84  | 9.79 | 9.8   | hypothetical protein [Proteus phage phiP4-3]          | 100% | 4.00E-55  | 100% | AUM58561.1     |           |           |
| 64 | 43866...44138 | - | 90  | 7.74 | 10.5  | thioredoxin [Proteus phage PM2]                       | 100% | 1.00E-54  | 90%  | ASZ76332.1     |           |           |
| 65 | 44135...44404 | - | 89  | 4.54 | 10.2  | hypothetical protein [Proteus phage phiP4-3]          | 100% | 2.00E-58  | 99%  | AUM58558.1     |           |           |
| 66 | 44653...44832 | - | 59  | 9.02 | 7.1   | hypothetical protein [Proteus phage phiP4-3]          | 100% | 4.00E-37  | 100% | AUM58557.1     |           |           |
| 67 | 44835...45830 | - | 331 | 8.29 | 37.7  | hypothetical protein [Escherichia phage phiE142]      | 98%  | 2.00E-168 | 71%  | ALY07921.1     | Nuc-trans | pfam10127 |
| 68 | 45833...46306 | - | 157 | 5.91 | 18.3  | hypothetical protein [Proteus phage phiP4-3]          | 100% | 2.00E-111 | 100% | AUM58555.1     |           |           |
| 69 | 46316...46522 | - | 68  | 5.06 | 8.0   | putative fiber protein [Proteus phage phiP4-3]        | 100% | 4.00E-41  | 100% | AUM58554.1     |           |           |
| 70 | 46519...46740 | - | 73  | 7.86 | 8.6   | hypothetical protein [Proteus phage phiP4-3]          | 100% | 2.00E-45  | 100% | AUM58553.1     | PRK0768   | PRK07681  |
| 71 | 46734...47312 | - | 192 | 6.6  | 21.7  | unkown                                                |      |           |      |                |           |           |
| 72 | 47506...48228 | - | 240 | 8.78 | 27.3  | hypothetical protein [Proteus phage phiP4-3]          | 100% | 4.00E-174 | 100% | AUM58550.1     |           |           |
| 73 | 48228...48446 | - | 72  | 8.03 | 8.5   | hypothetical protein [Proteus phage PM2]              | 100% | 1.00E-31  | 72%  | ASZ76343.1     |           |           |

|     |               |   |     |      |      |                                                    |      |           |      |                |                        |           |
|-----|---------------|---|-----|------|------|----------------------------------------------------|------|-----------|------|----------------|------------------------|-----------|
| 74  | 48430...48708 | - |     | 6.23 | 10.4 | unkown                                             |      |           |      |                |                        |           |
| 75  | 48709...48915 | - | 68  | 9.04 | 8.0  | putative membrane protein [Proteus phage phiP4-3]  | 100% | 8.00E-41  | 100% | AUM58548.1     | Imm_sup                | pfam14373 |
| 76  | 48915...49109 | - | 64  | 4.93 | 7.3  | putative membrane protein [Proteus phage vB_PmiM   | 98%  | 1.00E-19  | 68%  | YP_009195498.1 |                        |           |
| 77  | 49111...49296 | - | 61  | 6.02 | 7.3  | hypothetical protein [Proteus phage phiP4-3]       | 100% | 2.00E-36  | 100% | AUM58546.1     |                        |           |
| 78  | 49423...49686 | - | 87  | 5.28 | 10.0 | hypothetical protein [Proteus phage vB_PmiM_Pm5    | 100% | 3.00E-55  | 94%  | YP_009195501.1 | C4_traR                | TIGR02419 |
| 79  | 49687...50001 | - | 104 | 6.5  | 11.9 | hypothetical protein [Proteus phage phiP4-3]       | 100% | 2.00E-70  | 100% | AUM58543.1     | DUF2591                | pfam10765 |
| 80  | 49998...50570 | - | 190 | 6.7  | 22.4 | hypothetical protein [Proteus phage phiP4-3]       | 100% | 2.00E-139 | 99%  | AUM58542.1     |                        |           |
| 81  | 50574...50738 | - | 54  | 9.45 | 6.2  | hypothetical protein [Proteus phage vB_PmiM_Pm5    | 98%  | 2.00E-20  | 70%  | YP_009195503.1 |                        |           |
| 82  | 50804...51226 | - | 140 | 4.58 | 16.1 | hypothetical protein [Proteus phage phiP4-3]       | 100% | 3.00E-96  | 99%  | AUM58540.1     |                        |           |
| 83  | 51228...51839 | - | 203 | 5.06 | 23.5 | hypothetical protein [Proteus phage phiP4-3]       | 100% | 4.00E-150 | 100% | AUM58539.1     |                        |           |
| 84  | 51940...52230 | - | 96  | 4.77 | 11.0 | hypothetical protein [Klebsiella phage JD18]       | 100% | 7.00E-23  | 51%  | YP_009190674.1 | rI.-1                  | PHA02604  |
| 85  | 52307...52609 | - | 100 | 4.84 | 11.5 | lysis inhibition regulator [Proteus phage phiP4-3] | 100% | 7.00E-68  | 100% | AUM58537.1     | PHA0205                | PHA02054  |
| 86  | 52637...52849 | - | 70  | 9.3  | 8.4  | hypothetical protein [Proteus phage phiP4-3]       | 100% | 2.00E-41  | 97%  | AUM58536.1     |                        |           |
| 87  | 52871...53437 | - | 188 | 8.54 | 21.1 | thymidine kinase [Proteus phage vB_PmiM_Pm546      | 100% | 8.00E-103 | 79%  | YP_009195509.1 | Tdk                    | COG1435   |
| 88  | 53439...53651 | - | 70  | 9.34 | 8.3  | hypothetical protein [Proteus phage phiP4-3]       | 100% | 6.00E-43  | 100% | AUM58534.1     |                        |           |
| 89  | 53768...54208 | - | 146 | 9.17 | 16.6 | hypothetical protein [Proteus phage phiP4-3]       | 100% | 7.00E-104 | 100% | AUM58533.1     |                        |           |
| 90  | 54205...54519 | - | 104 | 5.33 | 11.6 | tRNA synthetase modifier [Morganella phage vB_M    | 81%  | 8.00E-27  | 56%  | YP_009279952.1 |                        |           |
| 91  | 54523...55083 | - | 186 | 8.73 | 21.6 | hypothetical protein [Proteus phage vB_PmiM_Pm5    | 100% | 8.00E-124 | 90%  | YP_009195515.1 | SLT                    | pfam01464 |
| 92  | 55080...55499 | - | 139 | 9.14 | 15.9 | site-specific RNA endonuclease [Morganella phage   | 99%  | 3.00E-32  | 44%  | YP_009279954.1 | REGB_T                 | pfam10715 |
| 93  | 55499...55897 | - | 132 | 9.23 | 15.7 | hypothetical protein [Proteus phage PM2]           | 99%  | 2.00E-81  | 87%  | ASZ76363.1     | Pyr_excis              | pfam03013 |
| 94  | 55950...56318 | - | 122 | 4.97 | 13.9 | hypothetical protein [Proteus phage vB_PmiM_Pm5    | 100% | 2.00E-80  | 93%  | YP_009195518.1 |                        |           |
| 95  | 56318...56482 | - | 54  | 8.9  | 6.3  | hypothetical protein [Proteus phage phiP4-3]       | 100% | 4.00E-31  | 100% | AUM58528.1     |                        |           |
| 96  | 56485...56973 | - | 162 | 9.17 | 18.9 | hypothetical protein [Proteus phage phiP4-3]       | 100% | 2.00E-117 | 98%  | AUM58526.1     |                        |           |
| 97  | 57165...57347 | - | 60  | 4.16 | 7.0  | hypothetical protein [Proteus phage phiP4-3]       | 100% | 2.00E-31  | 88%  | AUM58524.1     |                        |           |
| 98  | 57349...57720 | - | 123 | 9.36 | 14.1 | endolysin [Proteus phage vB_PmiM_Pm5461]           | 98%  | 9.00E-71  | 83%  | YP_009195522.1 | Peptidase              | pfam13539 |
| 99  | 57760...58209 | - | 149 | 4.44 | 17.1 | hypothetical protein [Proteus phage phiP4-3]       | 100% | 2.00E-102 | 100% | AUM58522.1     |                        |           |
| 100 | 58199...58450 | - | 83  | 5.39 | 9.5  | unkown                                             |      |           |      |                |                        |           |
| 101 | 58447...58740 | - | 97  | 4.75 | 11.2 | hypothetical protein [Proteus phage phiP4-3]       | 49%  | 2.00E-26  | 98%  | AUM58520.1     |                        |           |
| 102 | 58737...59147 | - | 136 | 4.85 | 15.7 | nudix hydrolase [Proteus phage PM2]                | 98%  | 5.00E-79  | 84%  | ASZ76370.1     | Nudix hydrolase is a s |           |
| 103 | 59156...59377 | - | 73  | 4.33 | 8.6  | hypothetical protein [Proteus phage phiP4-3]       | 100% | 1.00E-43  | 96%  | AUM58518.1     |                        |           |
| 104 | 59368...59637 | - | 89  | 5.16 | 10.4 | hypothetical protein [Proteus phage phiP4-3]       | 100% | 4.00E-57  | 99%  | AUM58517.1     |                        |           |
| 105 | 59634...59897 | - | 87  | 6.23 | 10.3 | putative membrane protein [Proteus phage phiP4-3]  | 100% | 4.00E-46  | 83%  | AUM58516.1     |                        |           |
| 106 | 59897...60163 | - | 88  | 9.23 | 10.9 | hypothetical protein [Proteus phage phiP4-3]       | 100% | 3.00E-46  | 80%  | AUM58515.1     |                        |           |
| 107 | 60160...60639 | - | 159 | 4.78 | 18.4 | hypothetical protein [Proteus phage phiP4-3]       | 100% | 9.00E-97  | 89%  | AUM58514.1     |                        |           |
| 108 | 60636...61127 | - | 163 | 5.42 | 19.3 | hypothetical protein [Proteus phage phiP4-3]       | 100% | 6.00E-111 | 96%  | AUM58513.1     |                        |           |
| 109 | 61178...61774 | - | 198 | 5.81 | 22.3 | hypothetical protein [Proteus phage vB_PmiM_Pm5    | 100% | 9.00E-122 | 90%  | YP_009195527.1 |                        |           |
| 110 | 61771...62025 | - | 84  | 8.72 | 9.6  | hypothetical protein [Proteus phage phiP4-3]       | 100% | 6.00E-51  | 96%  | AUM58511.1     |                        |           |
| 111 | 62032...62487 | - | 151 | 7.65 | 17.9 | hypothetical protein [Proteus phage phiP4-3]       | 85%  | 2.00E-11  | 30%  | AUM58509.1     |                        |           |
| 112 | 62477...62914 | - | 145 | 7.64 | 17.3 | hypothetical protein [Proteus phage phiP4-3]       | 100% | 1.00E-89  | 89%  | AUM58509.1     |                        |           |

|     |               |      |      |       |       |                                                       |      |           |      |                |           |           |
|-----|---------------|------|------|-------|-------|-------------------------------------------------------|------|-----------|------|----------------|-----------|-----------|
| 113 | 62904...63374 | -    | 156  | 7.62  | 18.3  | hypothetical protein [Proteus phage phiP4-3]          | 100% | 1.00E-90  | 83%  | AUM58508.1     |           |           |
| 114 | 63374...63664 | -    | 96   | 7.74  | 10.7  | hypothetical protein [Proteus phage vB_PmiM_Pm5       | 100% | 8.00E-63  | 94%  | YP_009195532.1 |           |           |
| 115 | 63762...64112 | -    | 116  | 4.79  | 13.5  | hypothetical protein [Proteus phage vB_PmiM_Pm5       | 100% | 8.00E-44  | 58%  | YP_009195534.1 |           |           |
| 116 | 64231...64584 | -    | 117  | 4.73  | 13.0  | hypothetical protein [Proteus phage vB_PmiM_Pm5       | 100% | 4.00E-49  | 68%  | YP_009195536.1 | NlpD      | COG0739   |
| 117 | 64594...64986 | -    | 130  | 6.82  | 13.8  | hypothetical protein [Proteus phage PM2]              | 100% | 9.00E-58  | 67%  | ASZ76374.1     |           |           |
| 118 | 65310...65627 | -    | 105  | 4.25  | 12.3  | hypothetical protein [Proteus phage PM2]              | 100% | 4.00E-47  | 75%  | ASZ76375.1     |           |           |
| 119 | 65980...66585 | -    | 201  | 10.05 | 23.5  | putative endonuclease segD [Escherichia phage AR      | 97%  | 2.00E-53  | 51%  | YP_009167951.1 | GIY-YIG   | cd10444   |
| 120 | 66597...66779 | -    | 60   | 8.93  | 6.6   | putative membrane protein [Proteus phage phiP4-3]     | 100% | 8.00E-34  | 100% | AUM58501.1     |           |           |
| 121 | 67090...67380 | -    | 96   | 4.52  | 11.5  | hypothetical protein [Proteus phage vB_PmiM_Pm5       | 82%  | 7.00E-27  | 63%  | YP_009195540.1 |           |           |
| 122 | 67557...67859 | -    | 100  | 4.59  | 11.3  | hypothetical protein [Morganella phage vB_MmoM        | 91%  | 9.00E-18  | 52%  | YP_009279987.1 |           |           |
| 123 | 67923...68276 | -    | 117  | 7.88  | 13.3  | hypothetical protein [Proteus phage phiP4-3]          | 100% | 4.00E-53  | 75%  | AUM58497.1     |           |           |
| 124 | 68417...68791 | -    | 124  | 4.63  | 14.6  | hypothetical protein [Proteus phage phiP4-3]          | 100% | 2.00E-80  | 95%  | AUM58495.1     |           |           |
| 125 | 68810...69097 | -    | 95   | 7.84  | 11.0  | hypothetical protein [Proteus phage phiP4-3]          | 100% | 4.00E-61  | 97%  | AUM58494.1     |           |           |
| 126 | 69130...69342 | -    | 70   | 4.54  | 8.2   | hypothetical protein [Proteus phage phiP4-3]          | 100% | 2.00E-38  | 91%  | AUM58493.1     |           |           |
| 127 | 69343...69774 | -    | 143  | 4.27  | 16.6  | hypothetical protein [Proteus phage phiP4-3]          | 100% | 6.00E-97  | 96%  | AUM58492.1     |           |           |
| 128 | 69883...70161 | -    | 92   | 6.3   | 10.6  | hypothetical protein [Proteus phage phiP4-3]          | 100% | 4.00E-55  | 98%  | AUM58491.1     |           |           |
| 129 | 70223...70495 | -    | 90   | 9.36  | 10.6  | unkown                                                |      |           |      |                |           |           |
| 130 | 70556...71002 | -    | 148  | 5.06  | 16.7  | hypothetical protein [Proteus phage PM2]              | 100% | 1.00E-99  | 97%  | ASZ76385.1     | 57B       | PHA02574  |
| 131 | 70992...71252 | -    | 86   | 4.11  | 9.7   | hypothetical protein [Proteus phage phiP4-3]          | 100% | 1.00E-51  | 99%  | AUM58488.1     |           |           |
| 132 | 71233...71892 | -    | 219  | 5.49  | 25.7  | dNMP kinase [Proteus phage vB_PmiM_Pm5461]            | 100% | 3.00E-124 | 77%  | YP_009195550.1 | DRE_TIM   | cd07940   |
| 133 | 71895...72473 | -    | 192  | 4.85  | 21.8  | tail completion and sheath stabilizer protein [Proteu | 100% | 1.00E-131 | 94%  | YP_009195551.1 | Phage_T4  | pfam06841 |
| 134 | 72665...73474 | -    | 269  | 10.05 | 31.0  | putative DNA end protector during packaging [Prot     | 100% | 0         | 95%  | ASZ76389.1     | 2         | PHA02577  |
| 135 | 73471...73920 | -711 | 149  | 9.86  | 18.1  | head completion protein [Proteus phage vB_PmiM        | 100% | 5.00E-95  | 89%  | YP_009195553.1 | Tn7_Tnp   | pfam08722 |
| 136 | 73972...74523 | +    | 183  | 5.15  | 21.6  | baseplate wedge subunit [Morganella phage vB_Mn       | 100% | 1.00E-100 | 74%  | YP_009280001.1 | Phage_gp  | pfam11246 |
| 137 | 74520...76250 | +    | 576  | 5.43  | 64.0  | baseplate hub + tail lysozyme [Proteus phage PM2]     | 100% | 0         | 97%  | ASZ76392.1     | bacteriop | cd00735   |
| 138 | 76250...78313 | +    | 687  | 4.91  | 77.7  | hypothetical protein [Shigella phage SP18]            | 99%  | 0         | 59%  | YP_003934788.1 |           |           |
| 139 | 78315...80234 | +    | 639  | 5.05  | 73.1  | baseplate wedge subunit [Morganella phage vB_Mn       | 100% | 0         | 72%  | YP_009280005.1 | TIGR022   | TIGR02243 |
| 140 | 80234...83341 | +    | 1035 | 6.22  | 120.5 | baseplate wedge subunit [Proteus phage phiP4-3]       | 100% | 0         | 98%  | AUM58479.1     |           |           |
| 141 | 83341...84348 | +    | 335  | 4.88  | 38.4  | baseplate wedge tail fiber connector [Morganella ph   | 99%  | 0         | 79%  | YP_009280007.1 | Phage-Gp  | pfam09215 |
| 142 | 84407...85258 | +    | 283  | 5.91  | 31.1  | baseplate wedge subunit and tail pin [Proteus phage   | 100% | 0         | 96%  | YP_009195560.1 | T4_gp9    | pfam07880 |
| 143 | 85255...86991 | +    | 578  | 5.36  | 64.2  | baseplate wedge subunit and tail pin [Proteus phage   | 70%  | 0         | 94%  | YP_009195561.1 | T4_gp9    | pfam07880 |
| 144 | 86991...87611 | +    | 206  | 4.82  | 22.6  | baseplate wedge subunit and tail pin [Proteus phage   | 100% | 7.00E-133 | 86%  | YP_009195563.1 | GP11      | pfam08677 |
| 145 | 87611...88954 | +    | 447  | 9.49  | 48.3  | short tail fibers protein [Proteus phage vB_PmiM_P    | 100% | 0         | 88%  | YP_009195564.1 | 34        | PHA02584  |
| 146 | 88964...90700 | +    | 578  | 4.5   | 63.9  | fibrin protein [Proteus phage PM2]                    | 100% | 0         | 88%  | ASZ76406.1     |           |           |
| 147 | 90737...91663 | +    | 308  | 4.57  | 34.3  | neck protein [Proteus phage phiP4-3]                  | 100% | 0         | 100% | AUM58472.1     | 13        | PHA02554  |
| 148 | 91667...92410 | +    | 247  | 4.34  | 28.5  | neck protein [Morganella phage vB_MmoM_MP1]           | 99%  | 1.00E-128 | 72%  | YP_009280015.1 | T4_neck   | pfam11649 |
| 149 | 92496...93281 | +    | 261  | 5.1   | 30.6  | tail sheath stabilization protein [Proteus phage vB_P | 100% | 0         | 95%  | YP_009195568.1 | T4_gp15   | pfam16724 |
| 150 | 93284...93763 | +    | 159  | 4.67  | 17.9  | terminase small subunit [Morganella phage vB_Mm       | 94%  | 1.00E-78  | 77%  | YP_009280017.1 | DNA_Pa    | pfam11053 |
| 151 | 93735...95534 | +    | 599  | 5.29  | 68.4  | terminase large subunit [Morganella phage vB_Mm       | 99%  | 0         | 84%  | YP_009280018.1 | Terminas  | pfam03237 |



|     |                 |   |     |       |      |                                                      |      |           |      |                |           |           |
|-----|-----------------|---|-----|-------|------|------------------------------------------------------|------|-----------|------|----------------|-----------|-----------|
| 152 | 95565...97562   | + | 665 | 5.32  | 72.5 | tail sheath protein [Morganella phage vB_MmoM_N      | 99%  | 0         | 77%  | YP_009280019.1 | Phage_sh  | pfam04984 |
| 153 | 97600...98091   | + | 163 | 4.97  | 18.6 | tail tube protein [Morganella phage vB_MmoM_MF       | 100% | 1.00E-97  | 78%  | YP_009280020.1 | Phage_T4  | pfam06841 |
| 154 | 98149...99699   | + | 516 | 5.41  | 60.1 | portal vertex of head [Morganella phage vB_MmoM      | 99%  | 0         | 68%  | YP_009280021.1 | Peptidase | pfam07230 |
| 155 | 99700...99927   | + | 75  | 4.56  | 8.6  | prohead core protein [Proteus phage phiP4-3]         | 100% | 2.00E-40  | 99%  | AUM58464.1     | 67        | PHA02608  |
| 156 | 99939...100361  | + | 140 | 10.2  | 16.0 | prohead core protein [Proteus phage vB_PmiM_Pm       | 100% | 1.00E-76  | 91%  | YP_009195575.1 | 68        | PHA02586  |
| 157 | 100358...100984 | + | 208 | 5.97  | 22.8 | prohead core scaffold protein and protease [Morgan   | 99%  | 2.00E-111 | 79%  | YP_009280024.1 | Peptidase | pfam03420 |
| 158 | 101017...101811 | + | 264 | 4.44  | 29.6 | prohead core scaffold protein [Proteus phage vB_Pr   | 100% | 1.00E-145 | 86%  | YP_009195577.1 | 22        | PHA02557  |
| 159 | 101832...103382 | + | 516 | 5.12  | 56.3 | major capsid protein [Morganella phage vB_MmoM       | 100% | 0         | 81%  | YP_009280026.1 | Gp23      | pfam07068 |
| 160 | 103501...104751 | + | 416 | 4.83  | 46.3 | capsid vertex protein [Proteus phage PM2]            | 100% | 0         | 94%  | ASZ76424.1     | Gp23      | pfam07068 |
| 161 | 104808...105371 | - | 187 | 8.59  | 21.0 | hypothetical protein [Proteus phage PM2]             | 100% | 2.00E-103 | 77%  | ASZ76425.1     |           |           |
| 162 | 105563...105808 | - | 81  | 8.96  | 9.4  | hypothetical protein [Proteus phage phiP4-3]         | 100% | 5.00E-51  | 100% | AUM58456.1     |           |           |
| 163 | 105816...106820 | - | 334 | 5.12  | 38.0 | RNA ligase [Proteus phage PM2]                       | 99%  | 0         | 78%  | ASZ76428.1     | RNA_lig   | TIGR02307 |
| 164 | 106821...107156 | - | 111 | 4.75  | 13.2 | hypothetical protein [Proteus phage phiP4-3]         | 100% | 3.00E-66  | 89%  | AUM58454.1     |           |           |
| 165 | 107166...107450 | - | 94  | 9.56  | 11.3 | hypothetical protein [Proteus phage vB_PmiM_Pm5      | 100% | 1.00E-55  | 89%  | YP_009195585.1 |           |           |
| 166 | 107447...107638 | - | 63  | 10.24 | 7.6  | hypothetical protein [Proteus phage PM2]             | 100% | 3.00E-33  | 89%  | ASZ76431.1     | DUF2774   | pfam11242 |
| 167 | 107625...107798 | - | 57  | 4.63  | 6.7  | hypothetical protein [Proteus phage vB_PmiM_Pm5      | 100% | 3.00E-28  | 86%  | YP_009195587.1 |           |           |
| 168 | 107921...108262 | + | 113 | 10.01 | 13.1 | putative membrane protein [Proteus phage vB_PmiM     | 78%  | 9.00E-36  | 73%  | YP_009195589.1 |           |           |
| 169 | 108234...108656 | - | 140 | 5.28  | 16.4 | hypothetical protein [Proteus phage phiP4-3]         | 100% | 2.00E-100 | 99%  | AUM58449.1     |           |           |
| 170 | 108657...108854 | - | 65  | 3.94  | 7.5  | hypothetical protein [Proteus phage PM2]             | 96%  | 7.00E-23  | 70%  | ASZ76435.1     |           |           |
| 171 | 108855...109049 | - | 64  | 4.31  | 7.5  | hypothetical protein [Proteus phage phiP4-3]         | 100% | 1.00E-38  | 100% | AUM58447.1     |           |           |
| 172 | 109046...109879 | - | 277 | 4.4   | 32.4 | hypothetical protein [Proteus phage phiP4-3]         | 100% | 0         | 95%  | AUM58446.1     |           |           |
| 173 | 109873...110115 | - | 80  | 5.89  | 9.2  | hypothetical protein [Proteus phage PM2]             | 97%  | 9.00E-20  | 46%  | ASZ76436.1     |           |           |
| 174 | 110272...110616 | + | 114 | 9.32  | 12.9 | hypothetical protein [Proteus phage phiP4-3]         | 100% | 1.00E-79  | 100% | AUM58444.      |           |           |
| 175 | 110646...111560 | - | 304 | 4.83  | 33.3 | baseplate tail tube initiator [Morganella phage vB_M | 100% | 0         | 80%  | YP_009280045.1 | Phage_T4  | pfam06841 |
| 176 | 111560...112603 | - | 347 | 6     | 38.0 | baseplate tail tube cap [Proteus phage vB_PmiM_Pr    | 100% | 0         | 95%  | YP_009195595.1 | T4_tail_c | pfam11091 |
| 177 | 112603...114324 | - | 573 | 4.79  | 63.6 | baseplate hub subunit [Proteus phage PM2]            | 100% | 0         | 81%  | ASZ76440.1     |           |           |
| 178 | 114311...114829 | - | 172 | 6.17  | 19.8 | baseplate hub distal subunit [Proteus phage vB_Pmi   | 95%  | 1.00E-104 | 91%  | YP_009195597.1 | Phage_hu  | pfam11110 |
| 179 | 114792...115937 | - | 381 | 5.17  | 43.7 | baseplate hub subunit [Proteus phage vB_PmiM_Pn      | 100% | 0         | 96%  | YP_009195598.1 | Phage-tai | pfam09096 |
| 180 | 115915...116688 | - | 257 | 5.93  | 30.4 | baseplate hub subunit [Proteus phage PM2]            | 100% | 3.00E-168 | 89%  | ASZ76443.1     | T4_basep  | pfam12322 |
| 181 | 116734...117318 | + | 194 | 4.38  | 22.5 | baseplate hub subunit [Proteus phage vB_PmiM_Pn      | 100% | 1.00E-111 | 81%  | YP_009195600.1 | T4_basep  | pfam12322 |
| 182 | 117311...117697 | + | 128 | 5.4   | 14.5 | baseplate wedge subunit [Proteus phage PM2]          | 89%  | 5.00E-75  | 97%  | ASZ76445.1     | COG3624   | COG3628   |
| 183 | 117937...118347 | + | 136 | 7.7   | 15.7 | recombination, repair and ssDNA binding protein [N   | 100% | 2.00E-66  | 70%  | YP_009280053.1 | UvsY      | pfam11056 |
| 184 | 118344...118715 | + | 123 | 4.95  | 13.9 | hypothetical protein [Proteus phage PM2]             | 100% | 6.00E-58  | 71%  | ASZ76447.1     | uvsY.-2   | PHA02610  |
| 185 | 118733...118954 | - | 73  | 4.53  | 8.6  | hypothetical protein [Proteus phage vB_PmiM_Pm5      | 100% | 5.00E-39  | 93%  | YP_009195604.1 | UvsW      | pfam11637 |
| 186 | 118948...120453 | - | 501 | 8.97  | 57.0 | RNA-DNA and DNA-DNA helicase, ATPase [Prote          | 99%  | 0         | 94%  | YP_009195605.1 | DEXDc     | cd00046   |
| 187 | 120509...121222 | + | 237 | 4.58  | 27.7 | inhibitor of prohead protease [Proteus phage vB_Pn   | 100% | 1.00E-116 | 73%  | YP_009195606.1 |           |           |
| 188 | 121232...122056 | + | 274 | 4.56  | 31.2 | head outer capsid protein [Proteus phage vB_PmiM     | 98%  | 4.00E-62  | 46%  | YP_009195607.1 | halo_surf | TIGR04216 |
| 189 | 122090...122359 | - | 89  | 5.5   | 10.2 | hypothetical protein [Proteus phage phiP4-3]         | 100% | 4.00E-57  | 100% | AUM58429.1     |           |           |
| 190 | 122420...124483 | - | 687 | 7.05  | 77.2 | RNA polymerase ADP-ribosylase [Proteus phage ph      | 100% | 0         | 99%  | AUM58428.1     | ADPrib_   | pfam03496 |

|     |                 |   |     |      |      |                                                         |      |           |      |                |          |           |  |
|-----|-----------------|---|-----|------|------|---------------------------------------------------------|------|-----------|------|----------------|----------|-----------|--|
| 191 | 124564...124773 | - | 69  | 4.81 | 8.1  | unkown                                                  |      |           |      |                |          |           |  |
| 192 | 124862...125098 | - | 78  | 4.52 | 8.7  | hypothetical protein [Proteus phage phiP4-3]            | 100% | 2.00E-47  | 99%  | AUM58426.1     |          |           |  |
| 193 | 125317...126789 | - | 490 | 6.16 | 55.8 | DNA ligase [Proteus phage PM2]                          | 100% | 0         | 89%  | ASZ76460.1     | dn11     | TIGR00574 |  |
| 194 | 126799...127434 | - | 210 | 5.19 | 24.2 | hypothetical protein [Proteus phage PM2]                | 100% | 1.00E-147 | 95%  | ASZ76461.1     | 30.2     | PHA02597  |  |
| 195 | 127434...127877 | - | 147 | 4.67 | 16.9 | hypothetical protein [Proteus phage vB_PmiM_Pm5         | 100% | 4.00E-14  | 33%  | YP_009195615.1 |          |           |  |
| 196 | 127885...128337 | - | 150 | 5.12 | 16.9 | hypothetical protein [Proteus phage phiP4-3]            | 100% | 1.00E-101 | 99%  | AUM58421.1     |          |           |  |
| 197 | 128339...128659 | - | 106 | 4.82 | 12.2 | hypothetical protein [Proteus phage phiP4-3]            | 100% | 7.00E-73  | 100% | AUM58420.1     |          |           |  |
| 198 | 128656...129093 | - | 145 | 9.51 | 16.7 | hypothetical protein [Proteus phage vB_PmiM_Pm5         | 100% | 2.00E-80  | 77%  | YP_009195617.1 | Phage_30 | pfam08010 |  |
| 199 | 129138...129374 | - | 78  | 6.17 | 9.2  | hypothetical protein [Proteus phage phiP4-3]            | 100% | 3.00E-47  | 99%  | AUM58418.1     |          |           |  |
| 200 | 129624...129869 | - | 81  | 9.01 | 9.3  | rIII lysis inhibition accessory protein rapid lysis phe | 100% | 1.00E-40  | 81%  | YP_009280074.1 | PRK0675  | PRK06756  |  |
| 201 | 129943...130260 | - | 105 | 5.29 | 11.3 | head assembly cochaperone with GroEL [Proteus ph        | 99%  | 3.00E-50  | 76%  | YP_009195622.1 | Cpn10    | pfam00166 |  |
| 202 | 130260...130577 | - | 105 | 8.69 | 12.2 | tail fiber protein [Salmonella phage STP4-a]            | 100% | 4.00E-18  | 39%  | YP_009126152.1 | DUF2693  | pfam10902 |  |
| 203 | 130574...131125 | - | 183 | 8.18 | 20.1 | hypothetical protein4 [Yersinia phage fHe-Yen9-01]      | 98%  | 4.00E-90  | 72%  | ARB06007.1     |          |           |  |
| 204 | 131414...131752 | - | 112 | 6.1  | 12.8 | hypothetical protein [Proteus phage phiP4-3]            | 100% | 3.00E-76  | 100% | AUM58411.1     |          |           |  |
| 205 | 131752...132714 | - | 320 | 5.94 | 35.4 | phospho-2-dehydro-3-deoxyheptonate aldolase [Pro        | 100% | 0         | 86%  | YP_009195627.1 | DAHP_s   | pfam00793 |  |
| 206 | 132704...132964 | - | 86  | 5.16 | 10.0 | hypothetical protein [Proteus phage vB_PmiM_Pm5         | 96%  | 2.00E-43  | 81%  | YP_009195628.1 |          |           |  |
| 207 | 132957...133163 | - | 68  | 6.55 | 7.8  | hypothetical protein [Proteus phage phiP4-3]            | 100% | 5.00E-42  | 100% | AUM58408.1     |          |           |  |
| 208 | 133169...133360 | - | 63  | 9.1  | 7.3  | hypothetical protein [Proteus phage phiP4-3]            | 100% | 1.00E-37  | 97%  | AUM58407.1     |          |           |  |
| 209 | 133360...134358 | - | 332 | 7.2  | 39.2 | 3'-phosphatase, 5'-polynucleotide kinase [Proteus ph    | 100% | 0         | 99%  | AUM58406.1     | AAA_33   | pfam13671 |  |
| 210 | 134367...134537 | - | 56  | 4.52 | 6.6  | hypothetical protein [Proteus phage phiP4-3]            | 100% | 2.00E-33  | 100% | AUM58405.1     |          |           |  |
| 211 | 134534...135247 | - | 237 | 6.51 | 26.9 | hypothetical protein [Proteus phage phiP4-3]            | 100% | 2.00E-173 | 100% | AUM58404.1     |          |           |  |
| 212 | 135250...135462 | - | 70  | 4.65 | 7.9  | unkown                                                  |      |           |      |                |          |           |  |
| 213 | 135437...135745 | - | 102 | 8.77 | 12.0 | hypothetical protein [Proteus phage vB_PmiM_Pm5         | 96%  | 8.00E-54  | 84%  | YP_009195634.1 |          |           |  |
| 214 | 135742...136095 | - | 117 | 8.71 | 13.4 | hypothetical protein [Proteus phage PM2]                | 100% | 5.00E-55  | 69%  | ASZ76482.1     |          |           |  |
| 215 | 136092...136592 | - | 166 | 7.01 | 18.9 | inhibitor of host transcription [Proteus phage PM2]     | 100% | 4.00E-95  | 85%  | ASZ76483.1     |          |           |  |
| 216 | 136650...137768 | - | 372 | 4.88 | 43.1 | RNA ligase 1 and tail fiber attachment catalyst [Pro    | 100% | 0         | 87%  | YP_009195637.1 | RNA_lig  | TIGR02308 |  |
| 217 | 137765...138175 | - | 136 | 9.08 | 16.2 | endonuclease II [Proteus phage PM2]                     | 100% | 3.00E-95  | 99%  | ASZ76485.1     | GIY-YIG  | cd10436   |  |
| 218 | 138203...139375 | - | 390 | 4.91 | 45.7 | aerobic NDP reductase small subunit [Proteus phage      | 99%  | 0         | 94%  | YP_009195639.1 | NrdF     | COG0208   |  |
| 219 | 139516...141756 | - | 746 | 5.84 | 84.9 | ribonucleotide reductase of class Ia (aerobic , alpha   | 100% | 0         | 93%  | ASZ76487.1     | NrdA     | COG0209   |  |
| 220 | 141768...142334 | - | 188 | 8.87 | 21.9 | hypothetical protein [Proteus phage vB_PmiM_Pm5         | 99%  | 1.00E-105 | 80%  | YP_009195642.1 |          |           |  |
| 221 | 142342...142560 | - | 72  | 9.12 | 8.4  | hypothetical protein [Proteus phage vB_PmiM_Pm5         | 100% | 1.00E-38  | 85%  | YP_009195643.1 | DUF4320  | pfam14216 |  |
| 222 | 142788...143135 | - | 115 | 4.26 | 13.7 | hypothetical protein [Proteus phage phiP4-3]            | 100% | 3.00E-76  | 99%  | AUM58392.1     |          |           |  |
| 223 | 143144...143995 | - | 283 | 5.77 | 32.8 | thymidylate synthase [Morganella phage vB_MmoM          | 98%  | 1.00E-152 | 71%  | YP_009280098.1 | Thymidyl | pfam00303 |  |
| 224 | 143980...144252 | - | 90  | 6.56 | 10.5 | hypothetical protein [Proteus phage phiP4-3]            | 100% | 5.00E-58  | 99%  | AUM58388.1     |          |           |  |
| 225 | 144227...144634 | - | 135 | 8.68 | 15.7 | hypothetical protein [Proteus phage phiP4-3]            | 100% | 1.00E-94  | 99%  | AUM58387.1     |          |           |  |
| 226 | 144627...145028 | - | 133 | 7.01 | 15.6 | hypothetical protein Pm5461_226 [Proteus phage vB       | 100% | 3.00E-68  | 76%  | YP_009195648.1 |          |           |  |
| 227 | 145019...145648 | - | 209 | 5.78 | 23.8 | dihydrofolate reductase [Proteus phage phiP4-3]         | 100% | 5.00E-154 | 100% | AUM58385.1     | DHFR     | cd00209   |  |
| 228 | 146656...147552 | - | 298 | 4.81 | 33.3 | single-stranded DNA-binding protein [Proteus phag       | 100% | 0         | 93%  | ASZ76497.1     | gp32     | pfam08804 |  |
| 229 | 147594...148247 | - | 217 | 9.09 | 25.7 | DNA helicase loader [Proteus phage PM2]                 | 100% | 2.00E-148 | 95%  | ASZ76498.1     | T4_Gp59  | pfam08993 |  |

|     |                 |   |      |        |       |                                                                              |      |           |      |                |           |           |
|-----|-----------------|---|------|--------|-------|------------------------------------------------------------------------------|------|-----------|------|----------------|-----------|-----------|
| 230 | 148252...148521 | - | 89   | 4.55   | 10.1  | late promoter transcription accessory protein [Proteus phage vB_PmiM_Pm5461] | 100% | 1.00E-53  | 90%  | YP_009195652.1 | Trans_co  | pfam16805 |
| 231 | 148496...148765 | - | 89   | 4.88   | 10.4  | dsDNA binding protein [Proteus phage vB_PmiM_Pm5461]                         | 100% | 1.00E-55  | 96%  | YP_009195653.1 | Phage_D   | pfam11126 |
| 232 | 148774...149691 | - | 305  | 5.95 / | 35.7  | RNase H [Proteus phage vB_PmiM_Pm5461]                                       | 100% | 0         | 90%  | YP_009195654.1 | RNaseH    | pfam09293 |
| 233 | 149730...153386 | + | 1218 | 5.31   | 136.2 | long tail fiber proximal subunit [Proteus phage vB_PmiM_Pm5461]              | 100% | 0         | 94%  | YP_009195655.1 | 34        | PHA02584  |
| 234 | 153391...154497 | + | 368  | 4.71   | 41.0  | long tail fiber proximal connector [Proteus phage vB_PmiM_Pm5461]            | 100% | 0         | 83%  | YP_009195656.1 |           |           |
| 235 | 154704...155168 | + | 154  | 5.2    | 17.1  | long tail fiber distal connector [Proteus phage vB_PmiM_Pm5461]              | 100% | 2.00E-76  | 75%  | YP_009195657.1 | Phage_T   | pfam03903 |
| 236 | 155168...157261 | + | 697  | 8.97   | 76.5  | long tail fiber distal subunit [Proteus phage phiP4-3]                       | 100% | 0         | 72%  | AUM58374.1     | Peptidase | pfam13884 |
| 237 | 157261...157854 | + | 197  | 9.33   | 21.8  | distal long tail fiber assembly catalyst [Proteus phage phiP4-3]             | 100% | 9.00E-142 | 99%  | AUM58373.1     | GP38      | pfam05268 |
| 238 | 157896...158519 | + | 207  | 5.87   | 24.2  | holin lysis mediator [Proteus phage vB_PmiM_Pm5461]                          | 100% | 5.00E-149 | 97%  | YP_009195660.1 | Phage_hd  | pfam11031 |
| 239 | 158522...158917 | - | 131  | 8.93   | 14.9  | hypothetical protein [Proteus phage vB_PmiM_Pm5461]                          | 100% | 1.00E-47  | 59%  | YP_009195661.1 |           |           |
| 240 | 158920...159174 | - | 84   | 5.27   | 9.6   | hypothetical protein [Proteus phage vB_PmiM_Pm5461]                          | 100% | 4.00E-35  | 69%  | YP_009195662.1 |           |           |
| 241 | 159174...159533 | - | 119  | 4.3    | 13.9  | hypothetical protein [Proteus phage vB_PmiM_Pm5461]                          | 100% | 1.00E-51  | 69%  | YP_009195663.1 |           |           |
| 242 | 159530...159877 | - | 115  | 4.64   | 12.6  | hypothetical protein [Proteus phage phiP4-3]                                 | 100% | 6.00E-70  | 94%  | AUM58368.1     |           |           |
| 243 | 159879...160151 | - | 90   | 5.14   | 10.5  | anti-sigma 70 protein [Proteus phage vB_PmiM_Pm5461]                         | 100% | 1.00E-48  | 89%  | YP_009195665.1 | AsiA      | pfam09010 |
| 244 | 160126...160374 | - | 82   | 6.03   | 9.4   | hypothetical protein [Proteus phage phiP4-3]                                 | 100% | 6.00E-56  | 100% | AUM58366.1     |           |           |
| 245 | 160381...161094 | - | 237  | 7.86   | 26.8  | putative transcriptional regulator [Proteus phage PM2]                       | 84%  | 4.00E-126 | 88%  | ASZ76515.1     |           |           |
| 246 | 161113...161550 | - | 145  | 8.55   | 17.3  | hypothetical protein [Proteus phage vB_PmiM_Pm5461]                          | 100% | 2.00E-89  | 86%  | YP_009195668.1 | PHA0180   | PHA01806  |
| 247 | 161547...161738 | - | 63   | 4.98   | 7.7   | hypothetical protein [Proteus phage phiP4-3]                                 | 100% | 2.00E-38  | 100% | AUM58361.1     | PLN0253   | PLN02532  |
| 248 | 161731...161976 | - | 81   | 4.56   | 9.1   | hypothetical protein [Proteus phage phiP4-3]                                 | 100% | 4.00E-53  | 100% | AUM58364.1     |           |           |
| 249 | 162062...163417 | - | 451  | 7.63   | 51.5  | DNA topoisomerase [Proteus phage PM2]                                        | 100% | 0         | 86%  | ASZ76519.1     | GyrA      | COG0188   |
| 250 | 163472...163945 | - | 157  | 9.54   | 18.0  | nucleoid disruption protein [Proteus phage vB_PmiM_Pm5461]                   | 98%  | 4.00E-74  | 69%  | YP_009195672.1 |           |           |
| 251 | 163985...164605 | - | 206  | 6.59   | 23.4  | DNA endonuclease IV [Proteus phage vB_PmiM_Pm5461]                           | 100% | 1.00E-131 | 83%  | YP_009195673.1 |           |           |
| 252 | 164658...164858 | - | 66   | 9.33   | 7.4   | hypothetical protein [Proteus phage phiP4-3]                                 | 100% | 9.00E-40  | 100% | AUM58628.1     |           |           |

The predicted ORFs of phage vB\_SsoS\_008 , their putative function and conserved domain

|    | POSITION     | Strand | aa  | PI   | Mw (Kda) | Best BLAST hit (organism)                                    | Coverage | E value  | Identity | .              | Conserved domain |           |
|----|--------------|--------|-----|------|----------|--------------------------------------------------------------|----------|----------|----------|----------------|------------------|-----------|
| 1  | 98..469      | -      | 123 | 5.65 | 13.6     | hypothetical protein [Shigella phage phi2457T]               | 100%     | 2.00E-74 | 92%      | AYP69390.1     |                  |           |
| 2  | 855..1034    | -      | 59  | 5.55 | 6.8      | hypothetical protein [Shigella phage Sfin-1]                 | 62%      | 5.00E-07 | 67%      | ATN48438.1     |                  |           |
| 3  | 1162..1716   | -      | 184 | 9.51 | 20.4     | putative site specific DNA methylase [PHAGE_Shigel_Shf       | 63%      | 2.00E-74 | 95%      | AYP69365.1     |                  |           |
| 4  | 2521..2787   | +      | 88  | 4.59 | 10.2     | hypothetical protein [Shigella phage phi2457T]               | 98%      | 2.00E-46 | 89%      | AYP69373.1     |                  |           |
| 5  | 3336..3581   | +      | 81  | 9.39 | 9.6      | hypothetical protein [Shigella phage phi2457T]               | 72%      | 5.00E-29 | 85%      | AYP69378.1     |                  |           |
| 6  | 4098..4268   | +      | 56  | 6.81 | 6.4      | hypothetical protein [Escherichia phage vB_EcoS_SH2]         | 96%      | 1.00E-17 | 72%      | ARW57192.1     |                  |           |
| 7  | 4553..5020   | +      | 155 | 4.61 | 18.1     | hypothetical protein [Shigella virus Shf11]                  | 43%      | 2.00E-40 | 97%      | YP_004414828.1 |                  |           |
| 8  | 5064..5384   | +      | 106 | 6.89 | 11.9     | hypothetical protein [Shigella phage phi2457T]               | 71%      | 8.00E-37 | 86%      | AYP69374.1     |                  |           |
| 9  | 5814..6056   | +      | 80  | 7.96 | 8.8      | hypothetical protein [Shigella phage Sfin-1]                 | 88%      | 7.00E-27 | 75%      | ATN48426.1     |                  |           |
| 10 | 6061..6492   | +      | 143 | 6.22 | 16.4     | hypothetical protein [Shigella phage phi2457T]               | 47%      | 6.00E-44 | 100%     | AYP69414.1     |                  |           |
| 11 | 6476..6763   | +      | 95  | 6.27 | 11.2     | hypothetical protein [Shigella phage phi2457T]               | 100%     | 5.00E-62 | 96%      | AYP69396.1     | DUF3850          | pfam12961 |
| 12 | 6760..6924   | +      | 54  | 6.7  | 6.1      | hypothetical protein [Shigella phage Sfin-1]                 | 75%      | 1.00E-19 | 98%      | ATN48422.1     |                  |           |
| 13 | 6892..7188   | +      | 98  | 9.83 | 10.7     | unkown                                                       |          |          |          |                |                  |           |
| 14 | 7210..7371   | +      | 53  | 9.9  | 6.0      | hypothetical protein[Shigella phage phi2457T]                | 86%      | 7.00E-15 | 80%      | AYP69368.1     |                  |           |
| 15 | 7870..8046   | +      | 58  | 8.18 | 6.5      | hypothetical protein[Shigella phage phi2457T]                | 96%      | 1.00E-20 | 79%      | AYP69380.1     |                  |           |
| 16 | 8068..8238   | +      | 56  | 3.91 | 6.5      | hypothetical protein[Shigella phage phi2457T]                | 100%     | 1.00E-29 | 93%      | AYP69380.1     |                  |           |
| 17 | 8333..8878   | +      | 181 | 5.54 | 20.7     | 3'-phosphatase, 5'-polynucleotide kinase [Shigella phage phi | 97%      | 9.00E-94 | 80%      | AYP69371.1     | HAD_PNKP-C       | cd07502   |
| 18 | 9313..9525   | +      | 70  | 10.5 | 8.6      | hypothetical protein [Shigella phage phi2457T]               | 100%     | 6.00E-19 | 59%      | AYP69370.1     |                  |           |
| 19 | 9522..9719   | +      | 65  | 6.24 | 7.3      | hypothetical protein [Shigella phage Sfin-1]                 | 100%     | 1.00E-30 | 82%      | ATN48418.1     |                  |           |
| 20 | 9753..10001  | +      | 82  | 4.98 | 9.6      | hypothetical protein [Escherichia virus T1]                  | 84%      | 2.00E-29 | 80%      | YP_003884.1    |                  |           |
| 21 | 9998..10342  | +      | 114 | 8.44 | 13.0     | hypothetical protein [Shigella phage Sfin-1]                 | 100%     | 3.00E-56 | 79%      | ATN48416.1     |                  |           |
| 22 | 10876..11064 | +      | 62  | 11.6 | 7.2      | hypothetical protein [Shigella phage phi2457T]               | 50%      | 3.00E-08 | 81%      | AYP69423.1     |                  |           |
| 23 | 11069..11254 | +      | 61  | 6.21 | 7.0      | hypothetical protein [Escherichia phage Eco_BIFF]            | 100%     | 2.00E-23 | 79%      | AWY08701.1     |                  |           |
| 24 | 11544..12071 | +      | 175 | 9.88 | 19.9     | terminase small subunit [Shigella phage phi2457T]            | 90%      | 1.00E-68 | 73%      | AYP69372.1     |                  |           |
| 25 | 12226..13902 | +      | 75  | 9.14 | 8.9      | putative terminase large subunit [Escherichia phage Eco_B    | 100%     | 2.00E-87 | 96%      | AWY08628.1     | COG5362          | COG5362   |
| 26 | 13906..14484 | +      | 192 | 8.89 | 21.6     | portal protein [Shigella phage SH6]                          | 94%      | #####    | 85%      | APC44942.1     | phge_rel_HI1409  | TIGR01555 |
| 27 | 15009..15284 | +      | 91  | 4.86 | 10.4     | hypothetical protein [Shigella phage vB_SfIS-ISF001]         | 80%      | 1.00E-26 | 77%      | ATN94118.1     |                  |           |
| 28 | 15335..15577 | +      | 80  | 5.02 | 8.9      | minor capsid protein [Shigella phage phi2457T]               | 72%      | 6.00E-30 | 100%     | AYP69362.1     | DUF4297          | pfam14130 |
| 29 | 15574..15747 | +      | 57  | 10.6 | 6.3      | minor capsid protein [Shigella phage Sfin-1]                 | 94%      | 8.00E-25 | 91%      | ATN48406.1     |                  |           |
| 30 | 16032..16232 | +      | 66  | 8.37 | 7.2      | major capsid protein [Shigella phage SH6]                    | 90%      | 5.00E-31 | 95%      | APC44972.1     |                  |           |
| 31 | 16809..17129 | +      | 106 | 5.19 | 11.3     | putative major head subunit precursor [Enterobacteria phag   | 100%     | 3.00E-58 | 95%      | AWD90853.1     |                  |           |
| 32 | 17237..17422 | -      | 61  | 11   | 6.7      | unkown                                                       |          |          |          |                |                  |           |
| 33 | 17411..17686 | +      | 91  | 4.94 | 9.9      | hypothetical protein [Escherichia virus T1]                  | 86%      | 1.00E-42 | 91%      | YP_003896.1    |                  |           |
| 34 | 17736..18500 | +      | 254 | 6.2  | 26.8     | hypothetical protein [Shigella phage phi2457T]               | 86%      | #####    | 90%      | AYP69361.1     |                  |           |
| 35 | 18858..19529 | +      | 223 | 9.32 | 24.9     | hypothetical protein [Escherichia virus T1]                  | 97%      | #####    | 87%      | YP_003898.1    | COG4834          | COG4834   |

|    |              |   |     |      |      |                                                                  |      |          |      |                |                 |            |
|----|--------------|---|-----|------|------|------------------------------------------------------------------|------|----------|------|----------------|-----------------|------------|
| 36 | 19729..20355 | + | 208 | 7.06 | 23.3 | hypothetical protein [Escherichia phage JMPW2]                   | 55%  | 4.00E-63 | 81%  | ALT58155.2     | DUF4054         | pfam13262  |
| 37 | 20548..20841 | + | 97  | 5.43 | 11.0 | hypothetical protein [Escherichia phage ADB-2]                   | 73%  | 3.00E-30 | 82%  | YP_007112710.1 |                 |            |
| 38 | 21090..21380 | + | 96  | 9.74 | 10.4 | hypothetical protein [Escherichia phage JMPW1]                   | 63%  | 3.00E-31 | 92%  | ALT58239.2     |                 |            |
| 39 | 21468..21620 | + | 50  | 6.29 | 5.3  | hypothetical protein [Shigella virus Shfl1]                      | 52%  | 0.001    | 81%  | YP_004414857.1 |                 |            |
| 40 | 22942..23142 | + | 66  | 4.65 | 7.6  | hypothetical protein [Escherichia phage ADB-2]                   | 100% | 7.00E-38 | 97%  | YP_007112715.1 | DUF1799         | pfam08809  |
| 41 | 23184..23441 | + | 85  | 7.85 | 9.4  | phage tail tape measure protein [Escherichia phage ADB-2]        | 94%  | 2.00E-42 | 99%  | YP_007112716.1 |                 |            |
| 42 | 23415..23540 | - |     |      | 0.0  | unkown                                                           |      |          |      |                |                 |            |
| 43 | 23561..24400 | + | 279 | 8.79 | 29.3 | tail length tape-measure protein [Shigella phage Sfin-1]         | 97%  | #####    | 92%  | ATN48475.1     | TMP_2           | pfam06791  |
| 44 | 24470..24880 | + | 136 | 5    | 15.0 | tail length tape-measure protein [Shigella phage Sfin-1]         | 100% | 2.00E-78 | 93%  | ATN48475.1     |                 |            |
| 45 | 25080..26126 | + | 348 | 5.5  | 36.8 | putative tail tape measure protein [Escherichia phage Eco_1]     | 100% | 0        | 98%  | AWY08643.1     | Tape_meas_lam_C | pfam09718  |
| 46 | 26289..26486 | + | 65  | 9.62 | 7.1  | tail fibers protein [Shigella phage Sfin-1]                      | 58%  | 7.00E-18 | 97%  | ATN48474.1     | Phage_min_tail  | pfam05939  |
| 47 | 26570..27355 | + | 261 | 6.82 | 29.2 | minor tail protein [Shigella phage SH6]                          | 100% | 0        | 99%  | APC44909.1     | phage_tail_L    | TIGR01600  |
| 48 | 27352..28092 | + | 246 | 5.73 | 28.5 | putative minor tail protein [Escherichia phage Eco_BIFF]         | 100% | 0        | 99%  | AWY08646.1     |                 |            |
| 49 | 28089..28688 | + | 199 | 8.95 | 20.9 | putative tail assembly protein [Escherichia virus T1]            | 100% | #####    | 99%  | YP_003911.1    | COG4723         | COG4723    |
| 50 | 28834..29055 | + | 73  | 4.53 | 8.0  | putative tail fiber protein [Escherichia virus T1]               | 82%  | 7.00E-30 | 95%  | YP_003912.1    | COG4733         | COG4733    |
| 51 | 29045..29392 | + | 115 | 6.29 | 13.0 | tail fiber protein [Shigella phage vB_SflS-ISF001]               | 96%  | 1.00E-65 | 99%  | ATN94099.1     | COG4733         | COG4733    |
| 52 | 29352..29735 | + | 127 | 8.93 | 14.8 | putative tail fiber protein [Escherichia phage Eco_BIFF]         | 84%  | 2.00E-66 | 99%  | AWY08648.1     | COG4733         | COG4733    |
| 53 | 29758..30261 | + | 167 | 5.09 | 19.2 | tail fiber protein [Shigella phage vB_SflS-ISF001]               | 80%  | 3.00E-87 | 100% | ATN94099.1     | Phage-tail_3    | pfam13550  |
| 54 | 30224..31327 | + | 367 | 4.99 | 40.5 | putative tail fiber protein [Escherichia phage Eco_BIFF]         | 82%  | 0        | 99%  | AWY08648.1     | COG4733         | COG4733    |
| 55 | 31363..32322 | + | 319 | 5.04 | 34.6 | putative tail fiber protein [Escherichia virus T1]               | 90%  | #####    | 89%  | YP_003912.1    | DUF1983         | pfam09327  |
| 56 | 32627..32851 | - | 74  | 4.09 | 8.0  | hypothetical protein [Shigella phage SH6]                        | 75%  | 5.00E-21 | 82%  | APC44975.1     |                 |            |
| 57 | 33169..33390 | - | 73  | 9.13 | 8.1  | hypothetical protein [Shigella phage Sfin-1]                     | 45%  | 1.00E-10 | 85%  | ATN48468.1     | Esterase_lipase | cd00312    |
| 58 | 34026..35090 | + | 354 | 5.09 | 40.2 | exodeoxyribonuclease VIII [Escherichia virus T1]                 | 100% | 0        | 99%  | YP_003916.1    | DUF3799         | pfam12684  |
| 59 | 35132..35812 | + | 226 | 8.49 | 25.2 | putative recombination protein [Escherichia virus T1]            | 100% | #####    | 100% | YP_003917.1    | ERF             | pfam04404  |
| 60 | 35859..36272 | + | 137 | 6.11 | 15.7 | hypothetical protein [Shigella phage vB_SsoS-ISF002]             | 100% | 7.00E-96 | 98%  | ASD50899.1     | DUF3127         | pfam11325  |
| 61 | 36312..37169 | - | 285 | 7.71 | 32.1 | putative tail fiber [Escherichia phage Eco_BIFF]                 | 97%  | #####    | 78%  | AWY08655.1     |                 |            |
| 62 | 37252..38070 | - | 272 | 4.45 | 28.8 | tail fibers protein [Shigella phage Sfin-1]                      | 98%  | #####    | 92%  | ATN48464.1     | PHA00430        | PHA00430   |
| 63 | 38171..38662 | - | 163 | 4.91 | 18.6 | DNA primase/helicase [Shigella phage phi2457T]                   | 100% | #####    | 98%  | AYP69359.1     |                 |            |
| 64 | 38655..39059 | - | 134 | 9.56 | 14.9 | DNA primase [Shigella phage Sfin-1]                              | 97%  | 8.00E-89 | 96%  | ATN48463.1     | Prim_Zn_Ribbon  | smart00778 |
| 65 | 39237..39614 | - | 125 | 10.5 | 14.1 | hypothetical protein [Shigella phage Sfin-1]                     | 100% | 8.00E-83 | 96%  | ATN48462.1     | P22_Cro         | pfam14549  |
| 66 | 39723..41735 | + | 670 | 6.13 | 75.8 | putative ATP-dependent helicase [Escherichia phage Eco_1]        | 100% | 0        | 98%  | AWY08658.1     | Helicase_C      | pfam00271  |
| 67 | 41732..42148 | + | 138 | 8.59 | 15.8 | hypothetical protein [Shigella phage vB_SsoS-ISF002]             | 100% | 6.00E-98 | 100% | ASD50894.1     | VRR_NUC         | pfam08774  |
| 68 | 42312..42950 | + | 212 | 8.58 | 24.2 | putative DNA N-6-adenine-methyltransferase [Shigella phage Sfl1] | 100% | #####    | 97%  | ASD50893.1     | Dam             | pfam05869  |
| 69 | 42950..43198 | + | 82  | 4.48 | 9.5  | hypothetical protein [Escherichia phage Eco_BIFF]                | 100% | 2.00E-53 | 98%  | AWY08662.1     |                 |            |
| 70 | 43240..43473 | + | 77  | 9.42 | 9.0  | hypothetical protein [Shigella phage SH6]                        | 96%  | 3.00E-42 | 92%  | APC44907.1     |                 |            |
| 71 | 43451..43723 | + | 90  | 9.79 | 10.5 | hypothetical protein [Shigella phage Sfin-1]                     | 100% | 8.00E-55 | 94%  | ATN48456.1     |                 |            |
| 72 | 44034..44465 | + | 143 | 10   | 16.2 | hypothetical protein [Escherichia virus T1]                      | 65%  | 3.00E-42 | 81%  | YP_003929.1    |                 |            |
| 73 | 44663..44857 | + | 64  | 7.95 | 7.4  | hypothetical protein [Enterobacteria phage vB_EcoS_IME]          | 81%  | 1.00E-21 | 81%  | AWD90901.1     | MPP_Mre11_N     | cd00840    |
| 74 | 44943..45239 | + | 98  | 7.02 | 11.1 | hypothetical protein [Shigella virus Shfl1]                      | 100% | 6.00E-55 | 88%  | YP_004414881.1 |                 |            |

|    |              |   |     |      |      |                                                         |      |          |     |             |         |           |
|----|--------------|---|-----|------|------|---------------------------------------------------------|------|----------|-----|-------------|---------|-----------|
| 75 | 45270..45446 | + | 58  | 6.08 | 6.6  | hypothetical protein [Escherichia virus T1]             | 100% | 1.00E-32 | 95% | YP_003931.1 |         |           |
| 76 | 45517..45942 | + | 140 | 9.97 | 15.7 | endolysin [Shigella phage Sfin-1]                       | 65%  | 2.00E-54 | 90% | ATN48451.1  | RrrD    | COG3772   |
| 77 | 45942..46322 | + | 126 | 6.71 | 13.3 | spanin [Shigella phage SH6]                             | 79%  | 2.00E-50 | 84% | APC44951.1  |         |           |
| 78 | 46357..46698 | - | 113 | 5.46 | 12.4 | hypothetical protein [Escherichia phage Eco_BIFF]       | 61%  | 4.00E-34 | 86% | AWY08670.1  |         |           |
| 79 | 46762..46926 | - | 54  | 5.29 | 6.6  | hypothetical protein [Escherichia phage Eco_BIFF]       | 100% | 8.00E-30 | 96% | AWY08671.1  |         |           |
| 80 | 46996..47169 | - | 57  | 9.14 | 6.8  | hypothetical protein [Enterobacteria phage vB_EcoS_IME] | 100% | 7.00E-30 | 93% | AWD90895.1  |         |           |
| 81 | 47248..48741 | - | 497 | 7.62 | 55.4 | hypothetical protein [Escherichia phage vB_EcoS_SH2]    | 95%  | 0        | 95% | ARW57256.1  | DUF3987 | pfam13148 |
| 82 | 48755..49186 | - | 143 | 9.47 | 16.7 | hypothetical protein [Shigella phage phi2457T]          | 72%  | 4.00E-61 | 91% | AYP69383.1  |         |           |
| 83 | 49307..49603 | - | 98  | 4.13 | 10.8 | hypothetical protein [Shigella phage vB_SsoS-ISF002]    | 54%  | 2.00E-27 | 94% | ASD50958.1  |         |           |
