# Supplementary material for: Biodiversity of New Lytic Bacteriophages Infecting Shigella spp. in Freshwater Environment
Source: PubMed Central journal article supplement (PMC7925395; doi:10.3389/fmicb.2021.619323), 2021-02-17
Supplement: Data_Sheet_4.pdf [file Data_Sheet_4.pdf]

## CoreGenes analysis of vB\_SflM\_004

|                                               |
|-----------------------------------------------|
| The number of homologs in each column is : 93 |
| Total number of genes in genome 1 : 135       |
| % in common, with respect to genome 1: 68.89  |
| Total number of genes in genome 2 : 140       |
| % in common, with respect to genome 2: 66.43  |
| Total number of genes in genome 3 : 132       |
| % in common, with respect to genome 3: 70.45  |
| Total number of genes in genome 4 : 132       |
| % in common, with respect to genome 4: 70.45  |
| Total number of genes in genome 5 : 130       |
| % in common, with respect to genome 5: 71.54  |

| Function               | vB_SflM_004 (MK295205) | wv8 (EU877232) | phage 11 (KP869109) | phage 12 (KP869110) | BPS15Q2 (KX405003) |
|------------------------|------------------------|----------------|---------------------|---------------------|--------------------|
| hypothetical protein   | AZV01390.1             | ACJ71844.1     | AKE46524.1          | AKE46639.1          | ANT42360.1         |
| hypothetical protein   | AZV01395.1             | ACJ71840.1     | AKE46519.1          | AKE46644.1          | ANT42357.1         |
| hypothetical protein   | AZV01396.1             | ACJ71839.1     | AKE46518.1          | AKE46645.1          | ANT42486.1         |
| hypothetical protein   | AZV01397.1             | ACJ71838.1     | AKE46517.1          | AKE46646.1          | ANT42485.1         |
| hypothetical protein   | AZV01400.1             | ACJ71836.1     | AKE46515.1          | AKE46648.1          | ANT42483.1         |
| hypothetical protein   | AZV01401.1             | ACJ71834.1     | AKE46513.1          | AKE46650.1          | ANT42482.1         |
| hypothetical protein   | AZV01402.1             | ACJ71833.1     | AKE46512.1          | AKE46651.1          | ANT42481.1         |
| prohead assembly scaff | AZV01404.1             | ACJ71832.1     | AKE46511.1          | AKE46652.1          | ANT42480.1         |
| hypothetical protein   | AZV01405.1             | ACJ71831.1     | AKE46510.1          | AKE46653.1          | ANT42479.1         |
| hypothetical protein   | AZV01406.1             | ACJ71830.1     | AKE46509.1          | AKE46654.1          | ANT42478.1         |
| tail tube protein      | AZV01407.1             | ACJ71829.1     | AKE46508.1          | AKE46655.1          | ANT42477.1         |
| tail sheath monomer    | AZV01408.1             | ACJ71828.1     | AKE46507.1          | AKE46656.1          | ANT42476.1         |
| hypothetical protein   | AZV01410.1             | ACJ71827.1     | AKE46506.1          | AKE46657.1          | ANT42474.1         |
| hypothetical protein   | AZV01411.1             | ACJ71826.1     | AKE46505.1          | AKE46658.1          | ANT42473.1         |
| phosphatase            | AZV01413.1             | ACJ71824.1     | AKE46503.1          | AKE46660.1          | ANT42470.1         |
| hypothetical protein   | AZV01414.1             | ACJ71823.1     | AKE46502.1          | AKE46661.1          | ANT42469.1         |
| tail assembly protein  | AZV01415.1             | ACJ71821.1     | AKE46500.1          | AKE46663.1          | ANT42467.1         |
| hypothetical protein   | AZV01416.1             | ACJ71820.1     | AKE46499.1          | AKE46664.1          | ANT42466.1         |
| o-spanin               | AZV01417.1             | ACJ71819.1     | AKE46498.1          | AKE46665.1          | ANT42465.2         |
| i-spanin               | AZV01418.1             | ACJ71818.1     | AKE46497.1          | AKE46666.1          | ANT42464.1         |
| hypothetical protein   | AZV01419.1             | ACJ71817.1     | AKE46496.1          | AKE46667.1          | ANT42463.1         |
| polynucleotide kinase  | AZV01420.1             | ACJ71816.1     | AKE46495.1          | AKE46668.1          | ANT42462.1         |

|                           |            |            |            |            |            |
|---------------------------|------------|------------|------------|------------|------------|
| rIIB protein              | AZV01421.1 | ACJ71814.1 | AKE46493.1 | AKE46670.1 | ANT42460.1 |
| rIIA lysis inhibitor      | AZV01422.1 | ACJ71813.1 | AKE46492.1 | AKE46671.1 | ANT42459.1 |
| hypothetical protein      | AZV01423.1 | ACJ71951.1 | AKE46622.1 | AKE46673.1 | ANT42457.1 |
| nictotinate phosphoribo   | AZV01425.1 | ACJ71950.1 | AKE46621.1 | AKE46674.1 | ANT42456.1 |
| putative ribose-phospha   | AZV01427.1 | ACJ71949.1 | AKE46620.1 | AKE46675.1 | ANT42454.1 |
| hypothetical protein      | AZV01428.1 | ACJ71948.1 | AKE46619.1 | AKE46676.1 | ANT42453.1 |
| hypothetical protein      | AZV01429.1 | ACJ71947.1 | AKE46618.1 | AKE46677.1 | ANT42452.1 |
| hypothetical protein      | AZV01430.1 | ACJ71946.1 | AKE46617.1 | AKE46678.1 | ANT42451.1 |
| hypothetical protein      | AZV01431.1 | ACJ71945.1 | AKE46616.1 | AKE46679.1 | ANT42450.1 |
| anaerobic nucleoside-tri  | AZV01432.1 | ACJ71943.1 | AKE46615.1 | AKE46680.1 | ANT42448.1 |
| tail tube protein         | AZV01433.1 | ACJ71941.1 | AKE46613.1 | AKE46682.1 | ANT42446.1 |
| anaerobic ribonucleosid   | AZV01436.1 | ACJ71938.1 | AKE46611.1 | AKE46684.1 | ANT42445.1 |
| hypothetical protein      | AZV01437.1 | ACJ71937.1 | AKE46610.1 | AKE46685.1 | ANT42444.1 |
| ribonucleoside triphosph  | AZV01438.1 | ACJ71935.1 | AKE46608.1 | AKE46687.1 | ANT42442.1 |
| hypothetical protein      | AZV01439.1 | ACJ71934.1 | AKE46607.1 | AKE46688.1 | ANT42441.1 |
| ribonucleoside triphosph  | AZV01440.1 | ACJ71933.1 | AKE46606.1 | AKE46689.1 | ANT42440.1 |
| hypothetical protein      | AZV01441.1 | ACJ71932.1 | AKE46605.1 | AKE46690.1 | ANT42439.1 |
| hypothetical protein      | AZV01442.1 | ACJ71931.1 | AKE46604.1 | AKE46691.1 | ANT42438.1 |
| phosphoribosyl-ATP pyr    | AZV01443.1 | ACJ71930.1 | AKE46603.1 | AKE46692.1 | ANT42437.1 |
| hypothetical protein      | AZV01444.1 | ACJ71929.1 | AKE46602.1 | AKE46693.1 | ANT42436.1 |
| NAD synthetase            | AZV01445.1 | ACJ71928.1 | AKE46601.1 | AKE46694.1 | ANT42435.1 |
| HNH endonuclease          | AZV01446.1 | ACJ71927.1 | AKE46600.1 | AKE46695.1 | ANT42434.1 |
| exodeoxyribonuclease      | AZV01447.1 | ACJ71926.1 | AKE46599.1 | AKE46696.1 | ANT42433.1 |
| hypothetical protein      | AZV01448.1 | ACJ71925.1 | AKE46598.1 | AKE46697.1 | ANT42432.1 |
| DNA primase/helicase      | AZV01449.1 | ACJ71922.1 | AKE46595.1 | AKE46700.1 | ANT42430.1 |
| hypothetical protein      | AZV01450.1 | ACJ71921.1 | AKE46594.1 | AKE46701.1 | ANT42429.1 |
| deoxynucleotide monop     | AZV01451.1 | ACJ71920.1 | AKE46593.1 | AKE46702.1 | ANT42428.1 |
| minor tail protein        | AZV01452.1 | ACJ71919.1 | AKE46592.1 | AKE46703.1 | ANT42427.1 |
| hypothetical protein      | AZV01453.1 | ACJ71918.1 | AKE46591.1 | AKE46704.1 | ANT42426.1 |
| DNA polymerase            | AZV01454.1 | ACJ71917.1 | AKE46590.1 | AKE46705.1 | ANT42423.1 |
| hypothetical protein      | AZV01456.1 | ACJ71916.1 | AKE46589.1 | AKE46706.1 | ANT42421.1 |
| hypothetical protein      | AZV01457.1 | ACJ71913.1 | AKE46586.1 | AKE46709.1 | ANT42418.1 |
| hypothetical protein      | AZV01458.1 | ACJ71909.1 | AKE46582.1 | AKE46713.1 | ANT42415.1 |
| hypothetical protein      | AZV01459.1 | ACJ71908.1 | AKE46581.1 | AKE46714.1 | ANT42414.1 |
| hypothetical protein      | AZV01460.1 | ACJ71907.1 | AKE46580.1 | AKE46715.1 | ANT42413.1 |
| transcriptional regulator | AZV01461.1 | ACJ71905.1 | AKE46578.1 | AKE46717.1 | ANT42411.1 |
| nucleoside triphosphate   | AZV01462.1 | ACJ71904.1 | AKE46577.1 | AKE46718.1 | ANT42410.1 |
| hypothetical protein      | AZV01464.1 | ACJ71903.1 | AKE46576.1 | AKE46719.1 | ANT42409.1 |
| hypothetical protein      | AZV01466.1 | ACJ71901.1 | AKE46574.1 | AKE46721.1 | ANT42407.1 |

|                         |            |            |            |            |            |
|-------------------------|------------|------------|------------|------------|------------|
| thymidylate synthase    | AZV01467.1 | ACJ71900.1 | AKE46573.1 | AKE46722.1 | ANT42406.1 |
| holin                   | AZV01468.1 | ACJ71899.1 | AKE46572.1 | AKE46723.1 | ANT42405.1 |
| hypothetical protein    | AZV01469.1 | ACJ71898.1 | AKE46571.1 | AKE46724.1 | ANT42404.1 |
| tail fiber protein      | AZV01470.1 | ACJ71897.1 | AKE46570.1 | AKE46725.1 | ANT42403.1 |
| tail fiber protein      | AZV01474.1 | ACJ71896.1 | AKE46569.1 | AKE46726.1 | ANT42402.1 |
| hypothetical protein    | AZV01475.1 | ACJ71894.1 | AKE46567.1 | AKE46727.1 | ANT42400.1 |
| baseplate assembly prot | AZV01476.1 | ACJ71893.1 | AKE46566.1 | AKE46729.1 | ANT42399.1 |
| hypothetical protein    | AZV01478.1 | ACJ71884.1 | AKE46557.1 | AKE46738.1 | ANT42390.1 |
| hypothetical protein    | AZV01479.1 | ACJ71883.1 | AKE46556.1 | AKE46739.1 | ANT42389.1 |
| hypothetical protein    | AZV01482.1 | ACJ71881.1 | AKE46554.1 | AKE46741.1 | ANT42387.1 |
| hypothetical protein    | AZV01483.1 | ACJ71880.1 | AKE46553.1 | AKE46742.1 | ANT42386.1 |
| hypothetical protein    | AZV01484.1 | ACJ71879.1 | AKE46552.1 | AKE46743.1 | ANT42385.1 |
| major capsid protein    | AZV01486.1 | ACJ71876.1 | AKE46550.1 | AKE46744.1 | ANT42383.1 |
| head maturation protea  | AZV01487.1 | ACJ71875.1 | AKE46549.1 | AKE46746.1 | ANT42382.1 |
| hypothetical protein    | AZV01488.1 | ACJ71911.1 | AKE46584.1 | AKE46711.1 | ANT42417.1 |
| hypothetical protein    | AZV01489.1 | ACJ71914.1 | AKE46587.1 | AKE46708.1 | ANT42419.1 |
| hypothetical protein    | AZV01490.1 | ACJ71859.1 | AKE46539.1 | AKE46624.1 | ANT42373.1 |
| hypothetical protein    | AZV01492.1 | ACJ71858.1 | AKE46538.1 | AKE46625.1 | ANT42372.1 |
| hypothetical protein    | AZV01494.1 | ACJ71855.1 | AKE46535.1 | AKE46628.1 | ANT42371.1 |
| hypothetical protein    | AZV01496.1 | ACJ71854.1 | AKE46534.1 | AKE46629.1 | ANT42370.1 |
| tail protein            | AZV01497.1 | ACJ71853.1 | AKE46533.1 | AKE46630.1 | ANT42369.1 |
| endolysin               | AZV01500.1 | ACJ71852.1 | AKE46532.1 | AKE46631.1 | ANT42368.1 |
| hypothetical protein    | AZV01501.1 | ACJ71851.1 | AKE46531.1 | AKE46632.1 | ANT42367.1 |
| hypothetical protein    | AZV01502.1 | ACJ71850.1 | AKE46530.1 | AKE46633.1 | ANT42366.1 |
| hypothetical protein    | AZV01503.1 | ACJ71849.1 | AKE46529.1 | AKE46634.1 | ANT42365.1 |
| hypothetical protein    | AZV01504.1 | ACJ71848.1 | AKE46528.1 | AKE46635.1 | ANT42364.1 |
| hypothetical protein    | AZV01506.1 | ACJ71847.1 | AKE46527.1 | AKE46636.1 | ANT42363.1 |
| hypothetical protein    | AZV01507.1 | ACJ71846.1 | AKE46526.1 | AKE46637.1 | ANT42362.1 |
| hypothetical protein    | AZV01509.1 | ACJ71845.1 | AKE46525.1 | AKE46638.1 | ANT42361.1 |
| hypothetical protein    | AZV01511.1 | ACJ71843.1 | AKE46522.1 | AKE46641.1 | ANT42359.1 |
| hypothetical protein    | AZV01518.1 | ACJ71837.1 | AKE46516.1 | AKE46647.1 | ANT42484.1 |
| hypothetical protein    | AZV01522.1 | ACJ71815.1 | AKE46494.1 | AKE46669.1 | ANT42461.1 |

## CoreGenes analysis of vB\_SdyM\_006

|                                                |
|------------------------------------------------|
| The number of homologs in each column is : 212 |
| Total number of genes in genome 1 : 252        |
| % in common, with respect to genome 1: 84.13   |
| Total number of genes in genome 2 : 270        |
| % in common, with respect to genome 2: 78.52   |
| Total number of genes in genome 3 : 256        |
| % in common, with respect to genome 3: 82.81   |

| Function                           | vB_SdyM_006 (MK295204) | phiP4-3 (MG696114) | vB_PmiM_Pm5461 (KP890823) |
|------------------------------------|------------------------|--------------------|---------------------------|
| hypothetical protein               | AZV01138.1             | AUM58625.1         | AKA61864.1                |
| DNA topoisomerase subunit          | AZV01139.1             | AUM58622.1         | AKA61866.1                |
| hypothetical protein               | AZV01140.1             | AUM58621.1         | AKA61870.1                |
| hypothetical protein               | AZV01141.1             | AUM58620.1         | AKA61871.1                |
| hypothetical protein               | AZV01143.1             | AUM58618.1         | AKA61872.1                |
| hypothetical protein               | AZV01144.1             | AUM58617.1         | AKA61874.1                |
| hypothetical protein               | AZV01145.1             | AUM58616.1         | AKA61875.1                |
| exonuclease A                      | AZV01146.1             | AUM58615.1         | AKA61876.1                |
| DNA helicase                       | AZV01147.1             | AUM58614.1         | AKA61877.1                |
| anti-sigma factor                  | AZV01148.1             | AUM58613.1         | AKA61879.1                |
| hypothetical protein               | AZV01149.1             | AUM58612.1         | AKA61880.1                |
| dCTP pyrophosphatase               | AZV01150.1             | AUM58611.1         | AKA61881.1                |
| hypothetical protein               | AZV01151.1             | AUM58610.1         | AKA61882.1                |
| hypothetical protein               | AZV01155.1             | AUM58607.1         | AKA61884.1                |
| hypothetical protein               | AZV01156.1             | AUM58605.1         | AKA61886.1                |
| hypothetical protein               | AZV01157.1             | AUM58604.1         | AKA61887.1                |
| DNA primase subunit                | AZV01158.1             | AUM58603.1         | AKA61888.1                |
| hypothetical protein               | AZV01159.1             | AUM58602.1         | AKA61889.1                |
| DNA primase/helicase               | AZV01160.1             | AUM58601.1         | AKA61890.1                |
| head vertex assembly chaperone     | AZV01161.1             | AUM58600.1         | AKA61891.1                |
| Hef-like homing endonuclease       | AZV01162.1             | AUM58599.1         | AKA61892.1                |
| RecA-like recombinase protein      | AZV01163.1             | AUM58598.1         | AKA61893.1                |
| hypothetical protein               | AZV01164.1             | AUM58597.1         | AKA61896.1                |
| hypothetical protein               | AZV01165.1             | AUM58596.1         | AKA61897.1                |
| hypothetical protein               | AZV01166.1             | AUM58595.1         | AKA61898.1                |
| peptidase                          | AZV01168.1             | AUM58592.1         | AKA61900.1                |
| hypothetical protein               | AZV01169.1             | AUM58591.1         | AKA61901.1                |
| hypothetical protein               | AZV01170.1             | AUM58590.1         | AKA61902.1                |
| hypothetical protein               | AZV01171.1             | AUM58589.1         | AKA61903.1                |
| hypothetical protein               | AZV01172.1             | AUM58588.1         | AKA61904.1                |
| hypothetical protein               | AZV01174.1             | AUM58586.1         | AKA61905.1                |
| DNA polymerase                     | AZV01175.1             | AUM58585.1         | AKA61906.1                |
| hypothetical protein               | AZV01176.1             | AUM58584.1         | AKA61907.1                |
| translational repressor protein    | AZV01177.1             | AUM58583.1         | AKA61908.1                |
| DNA polymerase accessory protein c | AZV01178.1             | AUM58582.1         | AKA61909.1                |
| hypothetical protein               | AZV01179.1             | AUM58581.1         | AKA61910.1                |
| sliding clamp                      | AZV01180.1             | AUM58580.1         | AKA61911.1                |

|                                       |            |            |            |
|---------------------------------------|------------|------------|------------|
| RNA polymerase binding protein        | AZV01181.1 | AUM58579.1 | AKA61912.1 |
| hypothetical protein                  | AZV01182.1 | AUM58578.1 | AKA61913.1 |
| hypothetical protein                  | AZV01183.1 | AUM58577.1 | AKA61914.1 |
| hypothetical protein                  | AZV01184.1 | AUM58576.1 | AKA61915.1 |
| hypothetical protein                  | AZV01185.1 | AUM58575.1 | AKA61916.1 |
| hypothetical protein                  | AZV01186.1 | AUM58574.1 | AKA61917.1 |
| sigma factor for late transcription   | AZV01188.1 | AUM58573.1 | AKA61918.1 |
| hypothetical protein                  | AZV01189.1 | AUM58572.1 | AKA61919.1 |
| hypothetical protein                  | AZV01190.1 | AUM58571.1 | AKA61920.1 |
| hypothetical protein                  | AZV01191.1 | AUM58570.1 | AKA61921.1 |
| hypothetical protein                  | AZV01192.1 | AUM58569.1 | AKA61922.1 |
| anaerobic NTP reductase small subunit | AZV01194.1 | AUM58567.1 | AKA61923.1 |
| hypothetical protein                  | AZV01195.1 | AUM58566.1 | AKA61924.1 |
| anaerobic NTP reductase large subunit | AZV01198.1 | AUM58563.1 | AKA61925.1 |
| recombinase endonuclease VII          | AZV01199.1 | AUM58562.1 | AKA61926.1 |
| thioredoxin                           | AZV01201.1 | AUM58559.1 | AKA61928.1 |
| hypothetical protein                  | AZV01202.1 | AUM58558.1 | AKA61929.1 |
| hypothetical protein                  | AZV01203.1 | AUM58557.1 | AKA61931.1 |
| hypothetical protein                  | AZV01204.1 | AUM58396.1 | AKA61932.1 |
| hypothetical protein                  | AZV01205.1 | AUM58555.1 | AKA61934.1 |
| hypothetical protein                  | AZV01207.1 | AUM58553.1 | AKA61935.1 |
| hypothetical protein                  | AZV01208.1 | AUM58552.1 | AKA61936.1 |
| hypothetical protein                  | AZV01209.1 | AUM58550.1 | AKA61938.1 |
| hypothetical protein                  | AZV01210.1 | AUM58549.1 | AKA61939.1 |
| membrane protein                      | AZV01212.1 | AUM58548.1 | AKA61941.1 |
| membrane protein                      | AZV01213.1 | AUM58547.1 | AKA61942.1 |
| hypothetical protein                  | AZV01214.1 | AUM58546.1 | AKA61943.1 |
| hypothetical protein                  | AZV01215.1 | AUM58544.1 | AKA61945.1 |
| hypothetical protein                  | AZV01217.1 | AUM58542.1 | AKA61946.1 |
| hypothetical protein                  | AZV01218.1 | AUM58541.1 | AKA61947.1 |
| hypothetical protein                  | AZV01219.1 | AUM58540.1 | AKA61948.1 |
| hypothetical protein                  | AZV01220.1 | AUM58539.1 | AKA61949.1 |
| hypothetical protein                  | AZV01221.1 | AUM58538.1 | AKA61950.1 |
| lysis inhibition regulator            | AZV01222.1 | AUM58537.1 | AKA61951.1 |
| hypothetical protein                  | AZV01223.1 | AUM58536.1 | AKA61952.1 |
| thymidine kinase                      | AZV01224.1 | AUM58535.1 | AKA61953.1 |
| hypothetical protein                  | AZV01225.1 | AUM58534.1 | AKA61954.1 |
| hypothetical protein                  | AZV01226.1 | AUM58533.1 | AKA61957.1 |
| tRNA synthetase modifier              | AZV01227.1 | AUM58532.1 | AKA61958.1 |
| hypothetical protein                  | AZV01228.1 | AUM58531.1 | AKA61959.1 |
| site-specific RNA endonuclease        | AZV01229.1 | AUM58530.1 | AKA61960.1 |
| hypothetical protein                  | AZV01230.1 | AUM58529.1 | AKA61961.1 |
| hypothetical protein                  | AZV01231.1 | AUM58527.1 | AKA61962.1 |
| hypothetical protein                  | AZV01232.1 | AUM58528.1 | AKA61963.1 |
| hypothetical protein                  | AZV01233.1 | AUM58526.1 | AKA61964.1 |
| hypothetical protein                  | AZV01235.1 | AUM58523.1 | AKA61966.1 |
| hypothetical protein                  | AZV01236.1 | AUM58522.1 | AKA61967.1 |
| nudix hydrolase                       | AZV01239.1 | AUM58519.1 | AKA61968.1 |
| hypothetical protein                  | AZV01240.1 | AUM58518.1 | AKA61969.1 |
| membrane protein                      | AZV01242.1 | AUM58516.1 | AKA61970.1 |

|                                       |            |            |            |
|---------------------------------------|------------|------------|------------|
| hypothetical protein                  | AZV01246.1 | AUM58512.1 | AKA61971.1 |
| hypothetical protein                  | AZV01247.1 | AUM58511.1 | AKA61972.1 |
| hypothetical protein                  | AZV01250.1 | AUM58508.1 | AKA61974.1 |
| hypothetical protein                  | AZV01251.1 | AUM58507.1 | AKA61976.1 |
| hypothetical protein                  | AZV01252.1 | AUM58506.1 | AKA61978.1 |
| hypothetical protein                  | AZV01253.1 | AUM58505.1 | AKA61980.1 |
| hypothetical protein                  | AZV01254.1 | AUM58504.1 | AKA61979.1 |
| hypothetical protein                  | AZV01255.1 | AUM58503.1 | AKA61981.1 |
| membrane protein                      | AZV01257.1 | AUM58501.1 | AKA61983.1 |
| hypothetical protein                  | AZV01258.1 | AUM58500.1 | AKA61984.1 |
| hypothetical protein                  | AZV01260.1 | AUM58497.1 | AKA61988.1 |
| hypothetical protein                  | AZV01267.1 | AUM58489.1 | AKA61992.1 |
| hypothetical protein                  | AZV01268.1 | AUM58488.1 | AKA61993.1 |
| dNMP kinase                           | AZV01269.1 | AUM58487.1 | AKA61994.1 |
| tail completion and sheath stabilizer | AZV01270.1 | AUM58486.1 | AKA61995.1 |
| DNA end protector during packaging    | AZV01271.1 | AUM58485.1 | AKA61996.1 |
| head completion protein               | AZV01272.1 | AUM58484.1 | AKA61997.1 |
| baseplate wedge subunit               | AZV01273.1 | AUM58483.1 | AKA61998.1 |
| baseplate hub + tail lysozyme         | AZV01274.1 | AUM58482.1 | AKA61999.1 |
| hypothetical protein                  | AZV01275.1 | AUM58481.1 | AKA62000.1 |
| baseplate wedge subunit               | AZV01276.1 | AUM58480.1 | AKA62001.1 |
| baseplate wedge subunit               | AZV01277.1 | AUM58479.1 | AKA62002.1 |
| baseplate wedge tail fiber connector  | AZV01278.1 | AUM58478.1 | AKA62003.1 |
| baseplate wedge subunit and tail pin  | AZV01279.1 | AUM58477.1 | AKA62004.1 |
| baseplate wedge subunit and tail pin  | AZV01280.1 | AUM58476.1 | AKA62005.1 |
| baseplate wedge subunit and tail pin  | AZV01281.1 | AUM58475.1 | AKA62007.1 |
| short tail fibers protein             | AZV01282.1 | AUM58474.1 | AKA62008.1 |
| fibrin protein                        | AZV01283.1 | AUM58473.1 | AKA62009.1 |
| neck protein                          | AZV01284.1 | AUM58472.1 | AKA62010.1 |
| neck protein                          | AZV01285.1 | AUM58471.1 | AKA62011.1 |
| tail sheath stabilization protein     | AZV01286.1 | AUM58470.1 | AKA62012.1 |
| terminase small subunit               | AZV01287.1 | AUM58469.1 | AKA62013.1 |
| terminase large subunit               | AZV01288.1 | AUM58468.1 | AKA62014.1 |
| tail sheath protein                   | AZV01289.1 | AUM58467.1 | AKA62015.1 |
| tail tube protein                     | AZV01290.1 | AUM58466.1 | AKA62016.1 |
| portal vertex of head                 | AZV01291.1 | AUM58465.1 | AKA62017.1 |
| prohead core protein                  | AZV01292.1 | AUM58464.1 | AKA62018.1 |
| prohead core protein                  | AZV01293.1 | AUM58463.1 | AKA62019.1 |
| prohead core scaffold protein and pr  | AZV01294.1 | AUM58462.1 | AKA62020.1 |
| prohead core scaffold protein         | AZV01295.1 | AUM58461.1 | AKA62021.1 |
| major capsid protein                  | AZV01296.1 | AUM58460.1 | AKA62022.1 |
| capsid vertex protein                 | AZV01297.1 | AUM58459.1 | AKA62023.1 |
| hypothetical protein                  | AZV01298.1 | AUM58458.1 | AKA62024.1 |
| hypothetical protein                  | AZV01299.1 | AUM58456.1 | AKA62026.1 |
| RNA ligase                            | AZV01300.1 | AUM58455.1 | AKA62027.1 |
| hypothetical protein                  | AZV01301.1 | AUM58454.1 | AKA62028.1 |
| hypothetical protein                  | AZV01302.1 | AUM58453.1 | AKA62029.1 |
| hypothetical protein                  | AZV01303.1 | AUM58452.1 | AKA62030.1 |
| hypothetical protein                  | AZV01304.1 | AUM58451.1 | AKA62031.1 |
| hypothetical protein                  | AZV01306.1 | AUM58449.1 | AKA62034.1 |

|                                         |            |            |            |
|-----------------------------------------|------------|------------|------------|
| hypothetical protein                    | AZV01310.1 | AUM58445.1 | AKA62035.1 |
| hypothetical protein                    | AZV01311.1 | AUM58444.1 | AKA62037.1 |
| baseplate tail tube initiator           | AZV01312.1 | AUM58443.1 | AKA62038.1 |
| baseplate tail tube cap                 | AZV01313.1 | AUM58442.1 | AKA62039.1 |
| baseplate hub subunit                   | AZV01314.1 | AUM58441.1 | AKA62040.1 |
| baseplate hub distal subunit            | AZV01315.1 | AUM58440.1 | AKA62041.1 |
| baseplate hub subunit                   | AZV01316.1 | AUM58439.1 | AKA62042.1 |
| baseplate hub subunit                   | AZV01317.1 | AUM58438.1 | AKA62043.1 |
| baseplate hub subunit                   | AZV01318.1 | AUM58437.1 | AKA62044.1 |
| baseplate wedge subunit                 | AZV01319.1 | AUM58436.1 | AKA62045.1 |
| recombination, repair and ssDNA bir     | AZV01320.1 | AUM58435.1 | AKA62046.1 |
| hypothetical protein                    | AZV01321.1 | AUM58434.1 | AKA62047.1 |
| hypothetical protein                    | AZV01322.1 | AUM58433.1 | AKA62048.1 |
| RNA-DNA and DNA-DNA helicase AT         | AZV01323.1 | AUM58432.1 | AKA62049.1 |
| inhibitor of prohead protease           | AZV01324.1 | AUM58431.1 | AKA62050.1 |
| head outer capsid protein               | AZV01325.1 | AUM58430.1 | AKA62051.1 |
| hypothetical protein                    | AZV01326.1 | AUM58429.1 | AKA62052.1 |
| RNA polymerase ADP-ribosylase           | AZV01327.1 | AUM58428.1 | AKA62054.1 |
| hypothetical protein                    | AZV01328.1 | AUM58427.1 | AKA62053.1 |
| hypothetical protein                    | AZV01329.1 | AUM58426.1 | AKA62055.1 |
| DNA ligase                              | AZV01330.1 | AUM58424.1 | AKA62057.1 |
| hypothetical protein                    | AZV01331.1 | AUM58423.1 | AKA62058.1 |
| hypothetical protein                    | AZV01332.1 | AUM58422.1 | AKA62059.1 |
| hypothetical protein                    | AZV01333.1 | AUM58421.1 | AKA62060.1 |
| hypothetical protein                    | AZV01335.1 | AUM58419.1 | AKA62061.1 |
| hypothetical protein                    | AZV01336.1 | AUM58418.1 | AKA62063.1 |
| rIII lysis inhibition accessory protein | AZV01337.1 | AUM58416.1 | AKA62065.1 |
| head assembly cochaperone with Gr       | AZV01338.1 | AUM58415.1 | AKA62066.1 |
| tail fiber protein                      | AZV01339.1 | AUM58414.1 | AKA62067.1 |
| hypothetical protein                    | AZV01340.1 | AUM58413.1 | AKA62068.1 |
| hypothetical protein                    | AZV01341.1 | AUM58411.1 | AKA62070.1 |
| phospho-2-dehydro-3-deoxyheptone        | AZV01342.1 | AUM58410.1 | AKA62071.1 |
| hypothetical protein                    | AZV01343.1 | AUM58409.1 | AKA62072.1 |
| hypothetical protein                    | AZV01344.1 | AUM58408.1 | AKA62073.1 |
| hypothetical protein                    | AZV01345.1 | AUM58407.1 | AKA62074.1 |
| 3'-phosphatase, 5'-polynucleotide ki    | AZV01346.1 | AUM58406.1 | AKA62075.1 |
| hypothetical protein                    | AZV01348.1 | AUM58404.1 | AKA62077.1 |
| hypothetical protein                    | AZV01350.1 | AUM58402.1 | AKA62078.1 |
| hypothetical protein                    | AZV01351.1 | AUM58401.1 | AKA62079.1 |
| inhibitor of host transcription         | AZV01352.1 | AUM58400.1 | AKA62080.1 |
| RNA ligase 1 and tail fiber attachmer   | AZV01353.1 | AUM58399.1 | AKA62081.1 |
| endonuclease II                         | AZV01354.1 | AUM58398.1 | AKA62082.1 |
| aerobic NDP reductase small subunit     | AZV01355.1 | AUM58397.1 | AKA62083.1 |
| ribonucleotide reductase of class Ia (  | AZV01356.1 | AUM58395.1 | AKA62085.1 |
| hypothetical protein                    | AZV01358.1 | AUM58393.1 | AKA62087.1 |
| hypothetical protein                    | AZV01359.1 | AUM58392.1 | AKA62088.1 |
| thymidylate synthase                    | AZV01360.1 | AUM58389.1 | AKA62089.1 |
| hypothetical protein                    | AZV01361.1 | AUM58388.1 | AKA62090.1 |
| hypothetical protein                    | AZV01362.1 | AUM58387.1 | AKA62091.1 |
| hypothetical protein                    | AZV01363.1 | AUM58386.1 | AKA62092.1 |

|                                         |            |            |            |
|-----------------------------------------|------------|------------|------------|
| dihydrofolate reductase                 | AZV01364.1 | AUM58385.1 | AKA62093.1 |
| single-stranded DNA-binding protein     | AZV01365.1 | AUM58382.1 | AKA62094.1 |
| DNA helicase loader                     | AZV01366.1 | AUM58381.1 | AKA62095.1 |
| late promoter transcription accessor    | AZV01367.1 | AUM58380.1 | AKA62096.1 |
| dsDNA binding protein                   | AZV01368.1 | AUM58379.1 | AKA62097.1 |
| RNase H                                 | AZV01369.1 | AUM58378.1 | AKA62098.1 |
| long tail fiber proximal subunit        | AZV01370.1 | AUM58377.1 | AKA62099.1 |
| long tail fiber proximal connector      | AZV01371.1 | AUM58376.1 | AKA62100.1 |
| long tail fiber distal connector        | AZV01372.1 | AUM58375.1 | AKA62101.1 |
| long tail fiber distal subunit          | AZV01373.1 | AUM58374.1 | AKA62102.1 |
| distal long tail fiber assembly catalys | AZV01374.1 | AUM58373.1 | AKA62103.1 |
| holin lysis mediator                    | AZV01375.1 | AUM58372.1 | AKA62104.1 |
| hypothetical protein                    | AZV01376.1 | AUM58371.1 | AKA62105.1 |
| hypothetical protein                    | AZV01377.1 | AUM58370.1 | AKA62106.1 |
| hypothetical protein                    | AZV01378.1 | AUM58369.1 | AKA62107.1 |
| hypothetical protein                    | AZV01379.1 | AUM58368.1 | AKA62108.1 |
| anti-sigma 70 protein                   | AZV01380.1 | AUM58367.1 | AKA62109.1 |
| hypothetical protein                    | AZV01381.1 | AUM58366.1 | AKA62110.1 |
| transcriptional regulator               | AZV01382.1 | AUM58365.1 | AKA62111.1 |
| hypothetical protein                    | AZV01383.1 | AUM58362.1 | AKA62112.1 |
| hypothetical protein                    | AZV01384.1 | AUM58361.1 | AKA62113.1 |
| hypothetical protein                    | AZV01385.1 | AUM58364.1 | AKA62114.1 |
| DNA topoisomerase                       | AZV01386.1 | AUM58363.1 | AKA62115.1 |
| nucleoid disruption protein             | AZV01387.1 | AUM58360.1 | AKA62116.1 |
| DNA endonuclease IV                     | AZV01388.1 | AUM58359.1 | AKA62117.1 |



# CoreGenes analysis of vB\_SsoS\_008

|                                               |
|-----------------------------------------------|
| The number of homologs in each column is : 50 |
| Total number of genes in genome 1 : 83        |
| % in common, with respect to genome 1: 60.24  |
| Total number of genes in genome 2 : 78        |
| % in common, with respect to genome 2: 64.1   |
| Total number of genes in genome 3 : 80        |
| % in common, with respect to genome 3: 62.5   |
| Total number of genes in genome 4 : 82        |
| % in common, with respect to genome 4: 60.98  |

| Function                          | vB_SsoS_008 (MK335533) | T1 (AY216660) | phi2457T (MH917278) | SH6 (KX828710) |
|-----------------------------------|------------------------|---------------|---------------------|----------------|
| hypothetical protein              | QAX92008.1             | AAP49998.1    | AYP69390.1          | APC44920.1     |
| hypothetical protein              | QAX92013.1             | AAP49926.1    | AYP69405.1          | APC44911.1     |
| hypothetical protein              | QAX92015.1             | AAP49929.1    | AYP69374.1          | APC44973.1     |
| hypothetical protein              | QAX92016.1             | AAP49930.1    | AYP69376.1          | APC44984.1     |
| hypothetical protein              | QAX92017.1             | AAP49931.1    | AYP69424.1          | APC44970.1     |
| hypothetical protein              | QAX92023.1             | AAP49935.1    | AYP69380.1          | APC44930.1     |
| kinase                            | QAX92024.1             | AAP49936.1    | AYP69371.1          | APC44960.1     |
| hypothetical protein              | QAX92026.1             | AAP49939.1    | AYP69370.1          | APC44910.1     |
| hypothetical protein              | QAX92027.1             | AAP49940.1    | AYP69410.1          | APC44980.1     |
| hypothetical protein              | QAX92028.1             | AAP49941.1    | AYP69392.1          | APC44950.1     |
| hypothetical protein              | QAX92029.1             | AAP49944.1    | AYP69423.1          | APC44918.1     |
| hypothetical protein              | QAX92030.1             | AAP49945.1    | AYP69419.1          | APC44962.1     |
| terminase small subunit           | QAX92031.1             | AAP49947.1    | AYP69372.1          | APC44944.1     |
| terminase large subunit           | QAX92032.1             | AAP49948.1    | AYP69351.1          | APC44953.1     |
| portal protein                    | QAX92033.1             | AAP49949.1    | AYP69353.1          | APC44942.1     |
| minor capsid protein              | QAX92035.1             | AAP49999.1    | AYP69362.1          | APC44922.1     |
| major head subunit precursor      | QAX92038.1             | AAP49950.1    | AYP69355.1          | APC44972.1     |
| hypothetical protein              | QAX92040.1             | AAP49951.1    | AYP69377.1          | APC44955.1     |
| hypothetical protein              | QAX92041.1             | AAP49952.1    | AYP69361.1          | APC44983.1     |
| hypothetical protein              | QAX92042.1             | AAP49953.1    | AYP69357.1          | APC44931.1     |
| hypothetical protein              | QAX92043.1             | AAP49954.1    | AYP69397.1          | APC44965.1     |
| hypothetical protein              | QAX92044.1             | AAP49956.1    | AYP69389.1          | APC44986.1     |
| hypothetical protein              | QAX92045.1             | AAP49957.1    | AYP69381.1          | APC44961.1     |
| hypothetical protein              | QAX92046.1             | AAP49958.1    | AYP69388.1          | APC44925.1     |
| hypothetical protein              | QAX92047.1             | AAP50000.1    | AYP69399.1          | APC44924.1     |
| tail tape measure protein         | QAX92052.1             | AAP49961.1    | AYP69348.1          | APC44947.1     |
| tail fibers protein               | QAX92053.1             | AAP49962.1    | AYP69391.1          | APC44974.1     |
| minor tail protein                | QAX92054.1             | AAP49963.1    | AYP69360.1          | APC44909.1     |
| minor tail protein                | QAX92055.1             | AAP49964.1    | AYP69363.1          | APC44919.1     |
| tail assembly protein             | QAX92056.1             | AAP49965.1    | AYP69369.1          | APC44963.1     |
| tail fiber protein                | QAX92061.1             | AAP49966.1    | AYP69347.1          | APC44985.1     |
| exodeoxyribonuclease VIII         | QAX92065.1             | AAP49970.1    | AYP69356.1          | APC44928.1     |
| recombination protein             | QAX92066.1             | AAP49971.1    | AYP69367.1          | APC44939.1     |
| hypothetical protein              | QAX92067.1             | AAP49972.1    | AYP69384.1          | APC44921.1     |
| tail fibers protein               | QAX92069.1             | AAP49973.1    | AYP69350.1          | APC44917.1     |
| DNA primase/helicase              | QAX92070.1             | AAP49975.1    | AYP69359.1          | APC44959.1     |
| hypothetical protein              | QAX92072.1             | AAP49976.1    | AYP69379.1          | APC44936.1     |
| ATP-dependent helicase            | QAX92073.1             | AAP49977.1    | AYP69349.1          | APC44976.1     |
| hypothetical protein              | QAX92074.1             | AAP49978.1    | AYP69382.1          | APC44943.1     |
| DNA N-6-adenine-methyltransferase | QAX92075.1             | AAP49979.1    | AYP69364.1          | APC44914.1     |
| hypothetical protein              | QAX92076.1             | AAP49980.1    | AYP69400.1          | APC44946.1     |

|                      |            |            |            |            |
|----------------------|------------|------------|------------|------------|
| hypothetical protein | QAX92077.1 | AAP49981.1 | AYP69411.1 | APC44907.1 |
| hypothetical protein | QAX92081.1 | AAP49983.1 | AYP69354.1 | APC44977.1 |
| hypothetical protein | QAX92082.1 | AAP49985.1 | AYP69420.1 | APC44915.1 |
| endolysin            | QAX92083.1 | AAP49986.1 | AYP69408.1 | APC44968.1 |
| spanin               | QAX92084.1 | AAP49988.1 | AYP69387.1 | APC44951.1 |
| hypothetical protein | QAX92087.1 | AAP49989.1 | AYP69386.1 | APC44945.1 |
| hypothetical protein | QAX92088.1 | AAP49990.1 | AYP69352.1 | APC44969.1 |
| hypothetical protein | QAX92089.1 | AAP49992.1 | AYP69383.1 | APC44956.1 |
| hypothetical protein | QAX92090.1 | AAP49993.1 | AYP69412.1 | APC44952.1 |
